# Supplementary material
Source: PubMed Central journal article supplement (PMC8022306)
Supplement: 784_2021_3916_MOESM1_ESM.pdf [file 784_2021_3916_MOESM1_ESM.pdf]

## Online Resource 1. Search Strategy

---

| Database (n)              |    | Search strategy #1 AND #2                                                                                                                                                                     |
|---------------------------|----|-----------------------------------------------------------------------------------------------------------------------------------------------------------------------------------------------|
| WoS, KJD,<br>RSCI, SCIELO | #1 | TOPIC: (covid 19 OR Novel Coronavirus OR 2019-nCoV OR coronavirus OR SARS-CoV-2)                                                                                                              |
|                           | #2 | RESEARCH AREAS: ( DENTISTRY ORAL SURGERY MEDICINE                                                                                                                                             |
| Scopus                    | #1 | TITLE-ABS-KEY ( covid 19 OR {Novel Coronavirus} OR 2019-ncov OR coronavirus OR sars-cov-2 )                                                                                                   |
|                           | #2 | LIMIT-TO ( SUBJAREA , "DENT" )                                                                                                                                                                |
| PubMed                    | #1 | "COVID-19" [Supplementary Concept] OR covid 19[Title/Abstract] OR Novel Coronavirus[Title/Abstract] OR 2019-nCoV[Title/Abstract] OR coronavirus[Title/Abstract] OR SARS-CoV-2[Title/Abstract] |
|                           | #2 | (dentaljournals[Filter])                                                                                                                                                                      |

---

WoS - Web of Science Core Collection, KJD - Korean Journal Database, RSCI - Russian Science Citation Index, SCIELO - SciELO Citation Index, Topic - article title, abstract and keywords
