# Supplementary material
Source: PubMed Central journal article supplement (PMC8022306)
Supplement: 784_2021_3916_MOESM2_ESM.pdf [file 784_2021_3916_MOESM2_ESM.pdf]

## Online Resource 2. Level of evidence ranking system based on study design

---

| LoE | Study design                                                                                                                                                   |
|-----|----------------------------------------------------------------------------------------------------------------------------------------------------------------|
| I   | Systematic review or meta-analysis of randomised controlled clinical trials                                                                                    |
| II  | Randomised controlled clinical trial                                                                                                                           |
| III | Controlled clinical trial                                                                                                                                      |
| IV  | Cohort study, case control study, systematic review or meta-analysis of cohort or case control studies                                                         |
| V   | Cross-sectional study, case series study, systematic review or meta-analysis of cross-sectional studies, case series or case reports                           |
| VI  | Case report                                                                                                                                                    |
| VII | Narrative literature review, panel and expert opinion, systematic review or meta-analysis of narrative reviews, editorials, guidelines, comments, perspectives |
| 0   | Animal research, <i>in vitro</i> / lab studies, systematic review or meta-analysis of animal, <i>in vitro</i> / lab studies                                    |

---

LoE - Level of Evidence
