# Supplementary material
Source: PubMed Central journal article supplement (PMC8022306)
Supplement: 784_2021_3916_MOESM3_ESM.pdf [file 784_2021_3916_MOESM3_ESM.pdf]

### Online Resource 3. A complete list of analysed Covid-19 articles

| Article_ID                                 | Article                                                                                                                                                                                                                                                                                                                                                                                                                                                                                                                        | TC  |
|--------------------------------------------|--------------------------------------------------------------------------------------------------------------------------------------------------------------------------------------------------------------------------------------------------------------------------------------------------------------------------------------------------------------------------------------------------------------------------------------------------------------------------------------------------------------------------------|-----|
| <b>XU H, 2020, INT J ORAL SCI</b>          | H. Xu, L. Zhong, J.X. Deng, J.K. Peng, H.X. Dan, X. Zeng, T.W. Li, Q.M. Chen, High expression of ACE2 receptor of 2019-nCoV on the epithelial cells of oral mucosa, <i>International Journal of Oral Science</i> 12(1) (2020).                                                                                                                                                                                                                                                                                                 | 251 |
| <b>TO KKW, 2020, LANCET INFECT DIS</b>     | K.K.W. To, O.T.Y. Tsang, W.S. Leung, A.R. Tam, T.C. Wu, D.C. Lung, C.C.Y. Yip, J.P. Cai, J.M.C. Chan, T.S.H. Chik, D.P.L. Lau, C.Y.C. Choi, L.L. Chen, W.M. Chan, K.H. Chan, J.D. Ip, A.C.K. Ng, R.W.S. Poon, C.T. Luo, V.C.C. Cheng, J.F.W. Chan, I.F.N. Hung, Z.W. Chen, H.L. Chen, K.Y. Yuen, Temporal profiles of viral load in posterior oropharyngeal saliva samples and serum antibody responses during infection by SARS-CoV-2: an observational cohort study, <i>Lancet Infectious Diseases</i> 20(5) (2020) 565-574. | 246 |
| <b>PENG X, 2020, INT J ORAL SCI</b>        | X. Peng, X. Xu, Y.Q. Li, L. Cheng, X.D. Zhou, B. Ren, Transmission routes of 2019-nCoV and controls in dental practice, <i>International Journal of Oral Science</i> 12(1) (2020).                                                                                                                                                                                                                                                                                                                                             | 186 |
| <b>MENG L, 2020, J DENT RES</b>            | L. Meng, F. Hua, Z. Bian, Coronavirus Disease 2019 (COVID-19): Emerging and Future Challenges for Dental and Oral Medicine, <i>Journal of Dental Research</i> 99(5) (2020) 481-487.                                                                                                                                                                                                                                                                                                                                            | 143 |
| <b>ATHER A, 2020, J ENDODONT</b>           | A. Ather, B. Patel, N.B. Ruparel, A. Diogenes, K.M. Hargreaves, Coronavirus Disease 19 (COVID-19): Implications for Clinical Dental Care, <i>Journal of Endodontics</i> 46(5) (2020) 584-595.                                                                                                                                                                                                                                                                                                                                  | 48  |
| <b>AZZI L, 2020, J INFECTION</b>           | L. Azzi, G. Carcano, F. Gianfagna, P. Grossi, D. Dalla Gasperina, A. Genoni, M. Fasano, F. Sessa, L. Tettamanti, F. Carinci, V. Maurino, A. Rossi, A. Tagliabue, A. Baj, Saliva is a reliable tool to detect SARS-CoV-2, <i>Journal of Infection</i> 81(1) (2020) E45-E50.                                                                                                                                                                                                                                                     | 26  |
| <b>GUO H, 2020, J DENT SCI</b>             | H. Guo, Y. Zhou, X. Liu, J. Tan, The impact of the COVID-19 epidemic on the utilization of emergency dental services, <i>Journal of Dental Sciences</i> (2020).                                                                                                                                                                                                                                                                                                                                                                | 26  |
| <b>CARRERAS-PRESA S CM, 2020, ORAL DIS</b> | C.M. Carreras-Presas, J.A. Sanchez, A.F. Lopez-Sanchez, E. Jane-Salas, M.L.S. Perez, Oral vesiculobullous lesions associated with SARS-CoV-2 infection, <i>Oral Diseases</i> (2020).                                                                                                                                                                                                                                                                                                                                           | 24  |

|                                                 |                                                                                                                                                                                                                                                                                                                                |    |
|-------------------------------------------------|--------------------------------------------------------------------------------------------------------------------------------------------------------------------------------------------------------------------------------------------------------------------------------------------------------------------------------|----|
| <b>IZZETTI R, 2020, J DENT RES</b>              | R. Izzetti, M. Nisi, M. Gabriele, F. Graziani, COVID-19 Transmission in Dental Practice: Brief Review of Preventive Measures in Italy, <i>Journal of Dental Research</i> 99(9) (2020) 1030-1038.                                                                                                                               | 22 |
| <b>DAY AT, 2020, ORAL ONCOL</b>                 | A.T. Day, D.J. Sher, R.C. Lee, J.M. Truelson, L.L. Myers, B.D. Sumer, L. Stankova, B.N. Tillman, R.S. Hughes, S.A. Khan, E.A. Gordin, Head and neck oncology during the COVID-19 pandemic: Reconsidering traditional treatment paradigms in light of new surgical and other multilevel risks, <i>Oral Oncology</i> 105 (2020). | 19 |
| <b>GE ZY, 2020, J ZHEJIANG UNIV-SC B</b>        | Z.Y. Ge, L.M. Yang, J.J. Xia, X.H. Fu, Y.Z. Zhang, Possible aerosol transmission of COVID-19 and special precautions in dentistry, <i>Journal of Zhejiang University-Science B</i> 21(5) (2020) 361-368.                                                                                                                       | 18 |
| <b>XU RS, 2020, INT J ORAL SCI</b>              | R.S. Xu, B.M. Cui, X.B. Duan, P. Zhang, X.D. Zhou, Q. Yuan, Saliva: potential diagnostic value and transmission of 2019-nCoV, <i>International Journal of Oral Science</i> 12(1) (2020).                                                                                                                                       | 17 |
| <b>AHMED MA, 2020, INT J ENV RES PUB HE</b>     | M.A. Ahmed, R. Jouhar, N. Ahmed, S. Adnan, M. Aftab, M.S. Zafar, Z. Khurshid, Fear and Practice Modifications among Dentists to Combat Novel Coronavirus Disease (COVID-19) Outbreak, <i>International Journal of Environmental Research and Public Health</i> 17(8) (2020).                                                   | 15 |
| <b>ALHARBI A, 2020, SAUDI DENT J</b>            | A. Alharbi, S. Alharbi, S. Alqaidi, Guidelines for dental care provision during the COVID-19 pandemic, <i>Saudi Dental Journal</i> 32(4) (2020) 181-186.                                                                                                                                                                       | 15 |
| <b>KHADER Y, 2020, JMIR PUBLIC HLTH SUR</b>     | Y. Khader, M. Al Nsour, O.B. Al-Batayneh, R. Saadeh, H. Bashier, M. Alfaqih, S. Al-Azzam, B.A. AlShurman, Dentists' Awareness, Perception, and Attitude Regarding COVID-19 and Infection Control: Cross-Sectional Study Among Jordanian Dentists, <i>Jmir Public Health and Surveillance</i> 6(2) (2020) 185-191.              | 13 |
| <b>IYER P, 2020, J DENT EDUC</b>                | P. Iyer, K. Aziz, D.M. Ojcius, Impact of COVID-19 on dental education in the United States, <i>Journal of Dental Education</i> 84(6) (2020) 718-722.                                                                                                                                                                           | 11 |
| <b>ZIMMERMANN M, 2020, J CRANIO MAXILL SURG</b> | M. Zimmermann, E. Nkenke, Approaches to the management of patients in oral and maxillofacial surgery during COVID-19 pandemic, <i>Journal of Cranio-Maxillofacial Surgery</i> 48(5) (2020) 521-526.                                                                                                                            | 11 |

|                                                     |                                                                                                                                                                                                                                                                                                                                                               |    |
|-----------------------------------------------------|---------------------------------------------------------------------------------------------------------------------------------------------------------------------------------------------------------------------------------------------------------------------------------------------------------------------------------------------------------------|----|
| <b>LO GIUDICE R, 2020, INT J ENV RES PUB HE</b>     | R. Lo Giudice, The Severe Acute Respiratory Syndrome Coronavirus-2 (SARS CoV-2) in Dentistry. Management of Biological Risk in Dental Practice, International Journal of Environmental Research and Public Health 17(9) (2020).                                                                                                                               | 10 |
| <b>FALLAHI HR, 2020, MAX PLAST RECONSTR S</b>       | H.R. Fallahi, S.O. Keyhan, D. Zandian, S.G. Kim, B. Cheshmi, Being a front-line dentist during the Covid-19 pandemic: a literature review, Maxillofacial Plastic and Reconstructive Surgery 42(1) (2020).                                                                                                                                                     | 9  |
| <b>FINI MB, 2020, ORAL ONCOL-a</b>                  | M.B. Fini, What dentists need to know about COVID-19, Oral Oncology 105 (2020).                                                                                                                                                                                                                                                                               | 8  |
| <b>JAMAL M, 2020, ORAL DIS</b>                      | M. Jamal, M.N. Shah, S.H. Almarzooqi, H. Aber, S. Khawaja, R. El Abed, Z. Alkhatib, L.P. Samaranayake, Overview of transnational recommendations for COVID-19 transmission control in dental care settings, Oral Diseases (2020).                                                                                                                             | 8  |
| <b>VOLGENANT CMC, 2020, NED TIJDSCHR TANDHEELKD</b> | C.M.C. Volgenant, I.F. Persoon, R.A.G. de Ruijter, J.J. de Soet, Infection control in dental health care during and after the SARS-CoV-2 outbreak, Oral Diseases (2020).                                                                                                                                                                                      | 8  |
| <b>YANG Y, 2020, CLIN ORAL INVEST</b>               | Y. Yang, Y. Zhou, X.Q. Liu, J.G. Tan, Health services provision of 48 public tertiary dental hospitals during the COVID-19 epidemic in China, Clinical Oral Investigations 24(5) (2020) 1861-1864.                                                                                                                                                            | 8  |
| <b>ABRAMOVITZ I, 2020, QUINTESSENCE INT</b>         | I. Abramovitz, A. Palmon, D. Levy, B. Karabucak, N. Kot-Limon, B. Shay, A. Kolokythas, G. Almozino, Dental care during the coronavirus disease 2019 (COVID-19 ) outbreak: operatory considerations and clinical aspects, Quintessence International 51(5) (2020) 418-429.                                                                                     | 6  |
| <b>DZIEDZIC A, 2020, ORAL DIS-a</b>                 | A. Dziedzic, R. Wojtyczka, The impact of coronavirus infectious disease 19 (COVID-19) on oral health, Oral Diseases (2020).                                                                                                                                                                                                                                   | 6  |
| <b>FIORILLO L, 2020, INT J ENV RES PUB HE</b>       | L. Fiorillo, G. Cervino, M. Matarese, C. D'Amico, G. Surace, V. Paduano, M.T. Fiorillo, A. Moschella, A. La Bruna, G.L. Romano, R. Laudicella, S. Baldari, M. Cicciu, COVID-19 Surface Persistence: A Recent Data Summary and Its Importance for Medical and Dental Settings, International Journal of Environmental Research and Public Health 17(9) (2020). | 6  |

|                                                                               |                                                                                                                                                                                                                                                                                                           |   |
|-------------------------------------------------------------------------------|-----------------------------------------------------------------------------------------------------------------------------------------------------------------------------------------------------------------------------------------------------------------------------------------------------------|---|
| <b>ODEH ND, 2020, INT J ENV RES PUB HE</b>                                    | N.D. Odeh, H. Babkair, S. Abu-Hammad, S. Borzangy, A. Abu-Hammad, O. Abu-Hammad, COVID-19: Present and Future Challenges for Dental Practice, International Journal of Environmental Research and Public Health 17(9) (2020).                                                                             | 6 |
| <b>UMER F, 2020, INT ENDOD J</b>                                              | F. Umer, Z. Haji, K. Zafar, Role of respirators in controlling the spread of novel coronavirus (COVID-19) amongst dental healthcare providers: a review, International Endodontic Journal 53(8) (2020) 1062-1067.                                                                                         | 6 |
| <b>ARAYA-SALAS CRISTBAL, 2020, INTERNATIONAL JOURNAL OF ODONTOSTOMATOLOGY</b> | C. Araya-Salas, Consideraciones para la Atención de Urgencia Odontológica y Medidas Preventivas para COVID-19 (SARS-CoV 2), International journal of odontostomatology 14(3) (2020) 268-270.                                                                                                              | 5 |
| <b>AZZI L, 2020, ORAL DIS</b>                                                 | L. Azzi, G. Carcano, D. Dalla Gasperina, F. Sessa, V. Maurino, A. Baj, Two cases of COVID-19 with positive salivary and negative pharyngeal or respiratory swabs at hospital discharge: A rising concern, Oral Diseases (2020).                                                                           | 5 |
| <b>YANG Y, 2020, CHIN J DENT RES</b>                                          | Y. Yang, H.Y. Soh, Z.G. Cai, X. Peng, Y. Zhang, C.B. Guo, Experience of Diagnosing and Managing Patients in Oral Maxillofacial Surgery during the Prevention and Control Period of the New Coronavirus Pneumonia, Chinese Journal of Dental Research 23(1) (2020) 57-62.                                  | 5 |
| <b>KAMATE SK, 2020, DENT MED PROBL</b>                                        | S.K. Kamate, S. Sharma, S. Thakar, D. Srivastava, K. Sengupta, A.J. Hadi, A. Chaudhary, R. Joshio, K. Dhanker, Assessing Knowledge, Attitudes and Practices of dental practitioners regarding the COVID-19 pandemic: A multinational study, Dental and Medical Problems 57(1) (2020) 11-17.               | 4 |
| <b>LI YQ, 2020, MOL ORAL MICROBIOL</b>                                        | Y.Q. Li, B. Ren, X. Peng, T. Hu, J.Y. Li, T. Gong, B.Y. Tang, X. Xu, X.D. Zhou, Saliva is a non-negligible factor in the spread of COVID-19, Molecular Oral Microbiology (2020).                                                                                                                          | 4 |
| <b>PANESAR K, 2020, J ORAL MAXIL SURG</b>                                     | K. Panesar, T. Dodson, J. Lynch, C. Bryson-Cahn, L. Chew, J. Dillon, Evolution of COVID-19 Guidelines for University of Washington Oral and Maxillofacial Surgery Patient Care, Journal of Oral and Maxillofacial Surgery 78(7) (2020) 1136-1146.                                                         | 4 |
| <b>RASSEKH CH, 2020, HEAD NECK-J SCI SPEC</b>                                 | C.H. Rassekh, C.M. Jenks, E.A. Ochroch, J.E. Douglas, B.W. O'Malley, G.S. Weinstein, Management of the difficult airway in the COVID-19 pandemic: Illustrative complex head and neck cancer scenario, Head and Neck-Journal for the Sciences and Specialties of the Head and Neck 42(6) (2020) 1273-1277. | 4 |

|                                                    |                                                                                                                                                                                                                                                                                                               |   |
|----------------------------------------------------|---------------------------------------------------------------------------------------------------------------------------------------------------------------------------------------------------------------------------------------------------------------------------------------------------------------|---|
| <b>SHACHAM M, 2020, INT J ENV RES PUB HE</b>       | M. Shacham, Y. Hamama-Raz, R. Kolerman, O. Mijiritsky, M. Ben-Ezra, E. Mijiritsky, COVID-19 Factors and Psychological Factors Associated with Elevated Psychological Distress among Dentists and Dental Hygienists in Israel, International Journal of Environmental Research and Public Health 17(8) (2020). | 4 |
| <b>SURI S, 2020, ANGLE ORTHOD</b>                  | S. Suri, Y.R. Vandersluis, A.S. Kochhar, R. Bhasin, M.N. Abdallah, Clinical orthodontic management during the COVID-19 pandemic, Angle Orthodontist 90(4) (2020) 473-484.                                                                                                                                     | 4 |
| <b>YOON JG, 2020, J KOREAN MED SCI</b>             | J.G. Yoon, J. Yoon, J.Y. Song, S.Y. Yoon, C.S. Lim, H. Seong, J.Y. Noh, H.J. Cheong, W.J. Kim, Clinical Significance of a High SARS-CoV-2 Viral Load in the Saliva, Journal of Korean Medical Science 35(20) (2020).                                                                                          | 4 |
| <b>BARABARI P, 2020, DENTISTRY J</b>               | P. Barabari, K. Moharamzadeh, Novel coronavirus (covid-19) and dentistryâa comprehensive review of literature, Dentistry Journal 8(2) (2020).                                                                                                                                                                 | 3 |
| <b>BHATTACHARJEE A, 2020, HEAD NECK-J SCI SPEC</b> | A. Bhattacharjee, V.M. Patil, R. Dikshit, K. Prabhash, A. Singh, P. Chaturvedi, Should we wait or not? The preferable option for patients with stage IV oral cancer in COVID-19 pandemic, Head and Neck-Journal for the Sciences and Specialties of the Head and Neck 42(6) (2020) 1173-1178.                 | 3 |
| <b>BRODERICK D, 2020, BRIT J ORAL MAX SURG</b>     | D. Broderick, P. Kyzas, K. Sanders, A. Sawyerr, C. Katre, L. Vassiliou, Surgical tracheostomies in Covid-19 patients: important considerations and the "5Ts" of safety, British Journal of Oral and Maxillofacial Surgery 58(5) (2020) 585-589.                                                               | 3 |
| <b>ELLIS R, 2020, BRIT J ORAL MAX SURG</b>         | R. Ellis, A.G.C. Hay-David, P.A. Brennan, Operating during the COVID-19 pandemic: How to reduce medical error, British Journal of Oral and Maxillofacial Surgery 58(5) (2020) 577-580.                                                                                                                        | 3 |
| <b>GUO JC, 2020, CLIN ORAL INVEST</b>              | J.C. Guo, H. Xie, M.N. Liang, H. Wu, COVID-19: a novel coronavirus and a novel challenge for oral healthcare, Clinical Oral Investigations 24(6) (2020) 2137-2138.                                                                                                                                            | 3 |
| <b>WANG CX, 2020, MED HYPOTHESES</b>               | C.X. Wang, H.M. Wu, X. Ding, H. Ji, P.F. Jiao, H.Y. Song, S. Li, H.M. Du, Does infection of 2019 novel coronavirus cause acute and/or chronic sialadenitis?, Medical Hypotheses 140 (2020).                                                                                                                   | 3 |
| <b>YU JJ, 2020, J ENDODONT</b>                     | J.J. Yu, T. Zhang, D. Zhao, M. Haapasalo, Y. Shen, Characteristics of Endodontic Emergencies during Coronavirus Disease 2019 Outbreak in Wuhan, Journal of Endodontics 46(6) (2020) 730-735.                                                                                                                  | 3 |
| <b>BHANUSHALI P, 2020, INT J DENT</b>              | P. Bhanushali, F. Katge, S. Deshpande, V.K. Chimata, S. Shetty, D. Pradhan, COVID-19: Changing Trends and Its Impact on Future of Dentistry, International Journal of Dentistry 2020 (2020).                                                                                                                  | 2 |

|                                                |                                                                                                                                                                                                                                                                                                                                     |   |
|------------------------------------------------|-------------------------------------------------------------------------------------------------------------------------------------------------------------------------------------------------------------------------------------------------------------------------------------------------------------------------------------|---|
| <b>BIDRA AS, 2020, J PROSTHODONT-a</b>         | A.S. Bidra, J.S. Pelletier, J.B. Westover, S. Frank, S.M. Brown, B. Tessema, Rapid In-Vitro Inactivation of Severe Acute Respiratory Syndrome Coronavirus 2 (SARS-CoV-2) Using Povidone-Iodine Oral Antiseptic Rinse, Journal of Prosthodontics-Implant Esthetic and Reconstructive Dentistry 29(6) (2020) 529-533.                 | 2 |
| <b>CHIESA-ESTOMBA CM, 2020, ORAL ONCOL</b>     | C.M. Chiesa-Estomba, J.R. Lechien, C. Calvo-Henriquez, N. Fakhry, P.D. Karkos, S. Peer, J.A. Sistiaga-Suarez, J.A. Gonzalez-Garcia, G. Cammaroto, M. Mayo-Yanez, P. Parente-Arias, S. Saussez, T. Ayad, Systematic review of international guidelines for tracheostomy in COVID-19 patients, Oral Oncology 108 (2020).              | 2 |
| <b>CIVANTOS AM, 2020, HEAD NECK-J SCI SPEC</b> | A.M. Civantos, R.M. Carey, G.R. Lichtenstein, J.N. Lukens, R.B. Cohen, C.H. Rassekh, Care of immunocompromised patients with head and neck cancer during the COVID-19 pandemic: Two challenging and informative clinical cases, Head and Neck-Journal for the Sciences and Specialties of the Head and Neck 42(6) (2020) 1131-1136. | 2 |
| <b>DZIEDZIC A, 2020, DENTISTRY J</b>           | A. Dziejdzic, Special care dentistry and covid-19 outbreak: What lesson should we learn?, Dentistry Journal 8(2) (2020).                                                                                                                                                                                                            | 2 |
| <b>FINI MB, 2020, ORAL ONCOL</b>               | M.B. Fini, Oral saliva and COVID-19, Oral Oncology 108 (2020).                                                                                                                                                                                                                                                                      | 2 |
| <b>KINARIWALA N, 2020, ORAL DIS</b>            | N. Kinariwala, L.P. Samaranayake, I. Perera, Z. Patel, Concerns and fears of Indian dentists on professional practice during the coronavirus disease 2019 (COVID-19) pandemic, Oral Diseases (2020).                                                                                                                                | 2 |
| <b>LONG RH, 2020, SPEC CARE DENT</b>           | R.H. Long, T.D. Ward, M.E. Pruett, J.F. Coleman, M.C. Plaisance, Modifications of emergency dental clinic protocols to combat COVID-19 transmission, Special Care in Dentistry 40(3) (2020) 219-226.                                                                                                                                | 2 |
| <b>MAFFIA F, 2020, INT J ORAL MAX SURG</b>     | F. Maffia, M. Fontanari, V. Vellone, P. Cascone, L.G. Mercuri, Impact of COVID-19 on maxillofacial surgery practice: a worldwide survey, International Journal of Oral and Maxillofacial Surgery 49(6) (2020) 827-835.                                                                                                              | 2 |
| <b>PEDITTO M, 2020, INT J ENV RES PUB HE</b>   | M. Peditto, S. Scapellato, A. Marciano, P. Costa, G. Oteri, Dentistry during the COVID-19 Epidemic: An Italian Workflow for the Management of Dental Practice, International Journal of Environmental Research and Public Health 17(9) (2020).                                                                                      | 2 |

|                                                                                    |                                                                                                                                                                                                                                                                                                                                                      |   |
|------------------------------------------------------------------------------------|------------------------------------------------------------------------------------------------------------------------------------------------------------------------------------------------------------------------------------------------------------------------------------------------------------------------------------------------------|---|
| <b>SEPLVEDA-VERDUGO CRISTBAL, 2020, INTERNATIONAL JOURNAL OF ODONTOSTOMATOLOGY</b> | C. Sepúlveda-Verdugo, A. Secchi-Álvarez, F. Donoso-Hofer, Consideraciones en la Atención Odontológica de Urgencia en Contexto de Coronavirus COVID-19 (SARS-CoV-2), International journal of odontostomatology 14(3) (2020) 279-284.                                                                                                                 | 2 |
| <b>AL-HALABI M, 2020, EUR ARCH PAEDIATR DE</b>                                     | M. Al-Halabi, A. Salami, E. Alnuaimi, M. Kowash, I. Hussein, Assessment of paediatric dental guidelines and caries management alternatives in the post COVID-19 period. A critical review and clinical recommendations, European Archives of Paediatric Dentistry (2020).                                                                            | 1 |
| <b>BIDRA AS, 2020, J PROSTHODONT</b>                                               | A.S. Bidra, J.S. Pelletier, J.B. Westover, S. Frank, S.M. Brown, B. Tessema, Comparison of In Vitro Inactivation of SARS CoV-2 with Hydrogen Peroxide and Povidone-Iodine Oral Antiseptic Rinses, Journal of Prosthodontics-Implant Esthetic and Reconstructive Dentistry (2020).                                                                    | 1 |
| <b>CAGETTI MG, 2020, INT J ENV RES PUB HE</b>                                      | M.G. Cagetti, J.L. Cairoli, A. Senna, G. Campus, COVID-19 Outbreak in North Italy: An Overview on Dentistry. A Questionnaire Survey, International Journal of Environmental Research and Public Health 17(11) (2020).                                                                                                                                | 1 |
| <b>CHECCHI V, 2020, INT DENT J</b>                                                 | V. Checchi, P. Bellini, D. Bencivenni, U. Consolo, COVID-19 dentistry-related aspects: a literature overview, International Dental Journal (2020).                                                                                                                                                                                                   | 1 |
| <b>CONSOLO U, 2020, DENT CADMOS</b>                                                | U. Consolo, D. Bencivenni, V. Checchi, P. Bellini, COVID-19 and dentistry: a new challenge, Dental Cadmos 88(6) (2020) 344-352.                                                                                                                                                                                                                      | 1 |
| <b>DUQUE-PARRA JORGE EDUARDO, 2020, INTERNATIONAL JOURNAL OF ODONTOSTOMATOLOGY</b> | J.E. Duque-Parra, D. Duque-Montoya, F.J.C. Peláez, El COVID-19 también Afecta el Sistema Nervioso por una de sus Compuertas: El Órgano Vascular de la Lámina Terminal y el Nervio Olfatorio. Alerta Neurológica, Prueba de Disosmia o Anosmia Puede Ayudar a Un Diagnóstico Rápido, International journal of odontostomatology 14(3) (2020) 285-287. | 1 |
| <b>FORNER D, 2020, ORAL ONCOL</b>                                                  | D. Forner, C.W. Noel, V. Wu, A. Parmar, K.K.W. Chan, J.R. de Almeida, Z. Husain, A. Eskander, Nonsurgical management of resectable oral cavity cancer in the wake of COVID-19: A rapid review and meta-analysis, Oral Oncology 109 (2020).                                                                                                           | 1 |

|                                                                                                    |                                                                                                                                                                                                                                                     |   |
|----------------------------------------------------------------------------------------------------|-----------------------------------------------------------------------------------------------------------------------------------------------------------------------------------------------------------------------------------------------------|---|
| <b>GIUDICE A, 2020,<br/>OPEN DENT J</b>                                                            | A. Giudice, F. Bennardo, A. Antonelli, S. Barone, L. Fortunato, COVID-19 is a New Challenge for Dental Practitioners: Advice on Patients' Management from Prevention of Cross Infections to Telemedicine, Open Dentistry Journal 14 (2020) 298-304. | 1 |
| <b>GUIEZ-COELHO<br/>MARCIAL, 2020,<br/>INTERNATIONAL<br/>JOURNAL OF<br/>ODONTOSTOMATO<br/>LOGY</b> | M. Gui?ez-Coelho, Impacto del COVID-19 (SARS-CoV-2) a Nivel Mundial, Implicancias y Medidas Preventivas en la Práctica Dental y sus Consecuencias Psicológicas en los Pacientes, International journal of odontostomatology 14(3) (2020) 271-278.   | 1 |
| <b>HAMMOND D, 2020,<br/>BRIT J ORAL MAX<br/>SURG</b>                                               | D. Hammond, F. Hughes, P. Stirrup, N. Barkworth, Setting up and maximising the usage of an Urgent Dental Care Centre in Blackpool. Sharing our experiences, British Journal of Oral and Maxillofacial Surgery 58(7) (2020) 834-837.                 | 1 |
| <b>HAY-DAVID AGC,<br/>2020, BRIT J ORAL<br/>MAX SURG</b>                                           | A.G.C. Hay-David, J.B.T. Herron, P. Gilling, A. Miller, P.A. Brennan, Reducing medical error during a pandemic, British Journal of Oral and Maxillofacial Surgery 58(5) (2020) 581-584.                                                             | 1 |
| <b>HERRERA D, 2020,<br/>CLIN ORAL INVEST</b>                                                       | D. Herrera, J. Serrano, S. Roldan, M. Sanz, Is the oral cavity relevant in SARS-CoV-2 pandemic?, Clinical Oral Investigations 24(8) (2020) 2925-2930.                                                                                               | 1 |
| <b>HOLMES S, 2020,<br/>BRIT J ORAL MAX<br/>SURG</b>                                                | S. Holmes, N. Bhatti, R. Bhandari, D. Chatzopoulou, Toward a consensus view in the management of acute facial injuries during the Covid-19 pandemic, British Journal of Oral and Maxillofacial Surgery 58(5) (2020) 571-576.                        | 1 |
| <b>LEAO JC, 2020,<br/>ORAL DIS</b>                                                                 | J.C. Leao, T.P.D. Gusmao, A.M. Zarzar, A.B.S. de Faria, I.H.M. Silva, L.A.M. Gueiros, N.A. Robinson, S. Porter, A.D.T. Carvalho, Coronaviridae-Old friends, new enemy!, Oral Diseases (2020).                                                       | 1 |
| <b>MELETI M, 2020,<br/>ORAL DIS</b>                                                                | M. Meleti, D. Cassi, L. Bueno, R. Bologna-Molina, COVID-19 diffusion and its impact on dental practice in distant countries with similar ethnic background, Oral Diseases (2020).                                                                   | 1 |
| <b>PASSARELLI PC,<br/>2020, AM J DENT</b>                                                          | P.C. Passarelli, M.A. Lopez, G.N.M. Bonaviri, F. Garcia-Godoy, A. D'Addona, Taste and smell as chemosensory dysfunctions in COVID-19 infection, American Journal of Dentistry 33(3) (2020) 135-137.                                                 | 1 |



|                                                                                                               |                                                                                                                                                                                                                                                                                                                       |   |
|---------------------------------------------------------------------------------------------------------------|-----------------------------------------------------------------------------------------------------------------------------------------------------------------------------------------------------------------------------------------------------------------------------------------------------------------------|---|
| <b>PUTRINO A, 2020,<br/>BMC ORAL<br/>HEALTH</b>                                                               | A. Putrino, M. Raso, C. Magazzino, G. Galluccio, Coronavirus (COVID-19) in Italy: knowledge, management of patients and clinical experience of Italian dentists during the spread of contagion, <i>Bmc Oral Health</i> 20(1) (2020).                                                                                  | 1 |
| <b>SANTOS-LPEZ<br/>MATAS, 2020,<br/>INTERNATIONAL<br/>JOURNAL OF<br/>ODONTOSTOMATO<br/>LOGY -a</b>            | M. Santos-López, D. Jaque-Ulloa, S. Serrano-Aliste, Métodos de Desinfección y Reutilización de Mascarillas con Filtro Respirador Durante la Pandemia de SARS-CoV-2, <i>International journal of odontostomatology</i> 14(3) (2020) 310-315.                                                                           | 1 |
| <b>SIGUA-RODRGUEZ<br/>EDER ALBERTO,<br/>2020,<br/>INTERNATIONAL<br/>JOURNAL OF<br/>ODONTOSTOMATO<br/>LOGY</b> | E.A. Sigua-Rodríguez, J.L. Bernal-Pérez, A.G. Lanata-Flores, C. Sánchez-Romero, J. Rodríguez-Chessa, Z.S. Haidar, S. Olate, L. Iwaki-Filho, COVID-19 y la Odontología: una Revisión de las Recomendaciones y Perspectivas para Latinoamérica, <i>International journal of odontostomatology</i> 14(3) (2020) 299-309. | 1 |
| <b>SOLDATOVA L,<br/>2020, HEAD NECK-J<br/>SCI SPEC</b>                                                        | L. Soldatova, C.H. Rassekh, Z.W. Baloch, J.B. Jalaly, N.I. Sedora-Roman, L.L. Loevner, D.M. Cognetti, R.L. Witt, P. Dulguerov, Salivary gland disease in the era of COVID-19 pandemic, <i>Head and Neck-Journal for the Sciences and Specialties of the Head and Neck</i> 42(6) (2020) 1339-1343.                     | 1 |
| <b>SPICCIARELLI V,<br/>2020, J ORAL SCI</b>                                                                   | V. Spicciarelli, C. Marruganti, M. Viviano, N. Baldini, G. Franciosi, M. Tortoriello, M. Ferrari, S. Grandini, A new framework to identify dental emergencies in the COVID-19 era, <i>Journal of Oral Science</i> 62(3) (2020) 344-347.                                                                               | 1 |
| <b>ZHAO ZG, 2020,<br/>BRIT J ORAL MAX<br/>SURG</b>                                                            | Z.G. Zhao, D. Gao, Precaution of 2019 novel coronavirus infection in department of oral and maxillofacial surgery, <i>British Journal of Oral and Maxillofacial Surgery</i> 58(3) (2020) 250-253.                                                                                                                     | 1 |
| <b>AGUILAR RR, 2020,<br/>ODOVTOS INT J<br/>DENT S</b>                                                         | R.R. Aguilar, Dentistry: its Role in the Transmission of SARS-CoV-2 Through Bioaerosols, <i>Odovtos International Journal of Dental Sciences</i> 22(3) (2020) 103-112.                                                                                                                                                | 0 |
| <b>AL-IZZI T, 2020, BR<br/>J ORAL</b>                                                                         | T. Al-Izzi, J. Breeze, R. Elledge, Following COVID-19 clinicians now overwhelmingly accept virtual clinics in Oral and Maxillofacial Surgery, <i>British Journal of Oral and Maxillofacial Surgery</i> (2020).                                                                                                        | 0 |

**MAXILLOFAC  
SURG**

|                                                       |                                                                                                                                                                                                                                                                                                                                                                                                                                                                                                                                    |   |
|-------------------------------------------------------|------------------------------------------------------------------------------------------------------------------------------------------------------------------------------------------------------------------------------------------------------------------------------------------------------------------------------------------------------------------------------------------------------------------------------------------------------------------------------------------------------------------------------------|---|
| <b>AL-TAWEEL FB,<br/>2020, EUR J DENT<br/>EDUC</b>    | F.B. Al-Taweel, A.A. Abdulkareem, S.S. Gul, M.L. Alshami, Evaluation of technology-based learning by dental students during the pandemic, European journal of dental education (2020).                                                                                                                                                                                                                                                                                                                                             | 0 |
| <b>ALLEVI F, 2020,<br/>BRIT J ORAL MAX<br/>SURG</b>   | F. Allevi, A. Dionisio, U. Baciliero, P. Balercia, G.A. Beltramini, D. Bertossi, A. Bozzetti, L. Califano, P. Cascone, L. Colombo, C. Copelli, F.S. De Ponte, G. De Riu, M. Della Monaca, S. Fusetti, M. Galie, A.B. Gianni, F. Longo, N. Mannucci, P.F. Nocini, S. Pelo, G. Ramieri, E. Sesenna, L. Solazzo, G. Spinelli, A. Tarsitano, G. Tartaro, V. Valentini, G. Verrina, F. Biglioli, Impact of COVID-19 epidemic on maxillofacial surgery in Italy, British Journal of Oral and Maxillofacial Surgery 58(6) (2020) 692-697. | 0 |
| <b>AMATO A, 2020, INT<br/>J ENV RES PUB HE</b>        | A. Amato, M. Caggiano, M. Amato, G. Moccia, M. Capunzo, F. De Caro, Infection Control in Dental Practice During the COVID-19 Pandemic, International Journal of Environmental Research and Public Health 17(13) (2020).                                                                                                                                                                                                                                                                                                            | 0 |
| <b>ATAS O, 2020,<br/>PEERJ</b>                        | O. Atas, T.T. Yildirim, Evaluation of knowledge, attitudes, and clinical education of dental students about COVID-19 pandemic, Peerj 8 (2020).                                                                                                                                                                                                                                                                                                                                                                                     | 0 |
| <b>AYUB K, 2020, BRIT<br/>DENT J</b>                  | K. Ayub, A. Alani, Acute endodontic and dental trauma provision during the COVID-19 crisis, British Dental Journal 229(3) (2020) 169-175.                                                                                                                                                                                                                                                                                                                                                                                          | 0 |
| <b>AZIZOLLAHI R,<br/>2020, APOS TRENDS<br/>ORTHOD</b> | R. Azizollahi, N. Mohajerani, C.H. Kau, M.L. Fang, S. Oberoi, Impact of SARS-CoV-2 on orthodontic education and global practice guidance: A scoping review, Apos Trends in Orthodontics 10(2) (2020) 78-88.                                                                                                                                                                                                                                                                                                                        | 0 |
| <b>BADANIAN A, 2020,<br/>ODONTOESTOMAT<br/>OLOGIA</b> | A. Badanian, Biosecurity in dentistry in times of pandemic COVID-19, Odontoestomatologia 22 (2020).                                                                                                                                                                                                                                                                                                                                                                                                                                | 0 |
| <b>BAI J, 2020, INT<br/>DENT J</b>                    | J. Bai, T. Xu, A.P. Ji, W. Sun, M.W. Huang, Impact of COVID-19 on oral emergency services, International Dental Journal (2020).                                                                                                                                                                                                                                                                                                                                                                                                    | 0 |
| <b>BAJAJ N, 2020,<br/>HEAD NECK-J SCI<br/>SPEC</b>    | N. Bajaj, B.P. Granwehr, E.Y. Hanna, M.S. Chambers, Salivary detection of SARS-CoV-2 (COVID-19) and implications for oral health-care providers, Head and Neck-Journal for the Sciences and Specialties of the Head and Neck 42(7) (2020) 1543-1547.                                                                                                                                                                                                                                                                               | 0 |

|                                                                            |                                                                                                                                                                                                                                                                                                                    |   |
|----------------------------------------------------------------------------|--------------------------------------------------------------------------------------------------------------------------------------------------------------------------------------------------------------------------------------------------------------------------------------------------------------------|---|
| <b>BARCA I, 2020, BRIT J ORAL MAX SURG</b>                                 | I. Barca, R. Cordaro, E. Kallaverja, F. Ferragina, M.G. Cristofaro, Management in oral and maxillofacial surgery during the COVID-19 pandemic: Our experience, British Journal of Oral and Maxillofacial Surgery 58(6) (2020) 687-691.                                                                             | 0 |
| <b>BENNARDO F, 2020, INT J DENT</b>                                        | F. Bennardo, A. Antonelli, S. Barone, M.M. Figliuzzi, L. Fortunato, A. Giudice, Change of Outpatient Oral Surgery during the COVID-19 Pandemic: Experience of an Italian Center, International Journal of Dentistry 2020 (2020).                                                                                   | 0 |
| <b>BIZZOCA ME, 2020, INT J ENV RES PUB HE</b>                              | M.E. Bizzoca, G. Campisi, L. Lo Muzio, Covid-19 Pandemic: What Changes for Dentists and Oral Medicine Experts? A Narrative Review and Novel Approaches to Infection Containment, International Journal of Environmental Research and Public Health 17(11) (2020).                                                  | 0 |
| <b>BLACKHALL KK, 2020, BRIT J ORAL MAX SURG</b>                            | K.K. Blackhall, I.P. Downie, P. Ramchandani, A. Kusanale, S. Walsh, B. Srinivasan, H. Shields, P.A. Brennan, R.P. Singh, Provision of emergency maxillofacial service during the COVID-19 pandemic : a collaborative five centre UK study, British Journal of Oral and Maxillofacial Surgery 58(6) (2020) 698-703. | 0 |
| <b>BLIGNAUT E, 2020, ACTA ODONTOL SCAND</b>                                | E. Blignaut, S. Nemitandani, L. Samaranayake, Strategic implementation of dental infection control in resource-poor jurisdictions during COVID-19 pandemic: a perspective from South Africa, Acta Odontologica Scandinavica (2020).                                                                                | 0 |
| <b>BLOCK MS, 2020, J ORAL MAXILLOFAC SURG</b>                              | M.S. Block, B.G. Rowan, Hypochlorous Acid: A Review, Journal of Oral and Maxillofacial Surgery 78(9) (2020) 1461-1466.                                                                                                                                                                                             | 0 |
| <b>BOIN-BAKIT CAMILA, 2020, INTERNATIONAL JOURNAL OF ODONTOSTOMATOLOGY</b> | C. Boin-Bakit, A. Melián-Rivas, La atención Odontológica a Pacientes COVID-19 Positivo ?Qué hacer ante una Urgencia?, International journal of odontostomatology 14(3) (2020) 321-324.                                                                                                                             | 0 |
| <b>BRAMBILLA E, 2020, DENT CADMOS</b>                                      | E. Brambilla, I. Iavicoli, G.A. Norelli, F. Cairo, V. Pinchi, Precautions during COVID-19 pandemic, Dental Cadmos 88(7) (2020) 412-421.                                                                                                                                                                            | 0 |
| <b>BRANDO TB, 2020, ORAL SURG ORAL MED ORAL</b>                            | T.B. Brand?o, L.A. Gueiros, T.S. Melo, A.C. Prado-Ribeiro, A. Nesrallah, G.V.B. Prado, A.R. Santos-Silva, C.A. Migliorati, Oral lesions in patients with SARS-CoV-2 infection: could the oral cavity be a, Oral surgery, oral medicine, oral pathology and oral radiology (2020).                                  | 0 |

**PATHOL ORAL  
RADIOL**

|                                                                                  |                                                                                                                                                                                                                                                                                                                                       |   |
|----------------------------------------------------------------------------------|---------------------------------------------------------------------------------------------------------------------------------------------------------------------------------------------------------------------------------------------------------------------------------------------------------------------------------------|---|
| <b>BRONDANI M, 2020,<br/>J DENT EDUC</b>                                         | M. Brondani, L. Donnelly, COVID-19 pandemic: Students' perspectives on dental geriatric care and education, Journal of Dental Education (2020).                                                                                                                                                                                       | 0 |
| <b>BROWN R, 2020,<br/>ORAL SURG ORAL<br/>MED ORAL<br/>PATHOL ORAL<br/>RADIOL</b> | R. Brown, H. Hussein, Hydroxychloroquine and the treatment of Sjogren syndrome, chronic ulcerative stomatitis, and oral lichen planus in the age of COVID-19, Oral Surgery, Oral Medicine, Oral Pathology and Oral Radiology (2020).                                                                                                  | 0 |
| <b>BUTLER D, 2020, BR<br/>J ORAL<br/>MAXILLOFAC<br/>SURG</b>                     | D. Butler, C. Davies-Husband, J. Dhanda, I. Francis, A. Gulati, K. Kapoor, L. Newman, P. Norris, Z. Sadiq, C. Surwald, N. Upile, T. Vorster, B. Bisase, Head and neck oncological ablation and reconstruction in the COVID-19 era - our experience to date, British Journal of Oral and Maxillofacial Surgery 58(8) (2020) 1008-1013. | 0 |
| <b>CAMPOMAR MS,<br/>2020,<br/>ODONTOESTOMAT<br/>OLOGIA</b>                       | M.S. Campomar, Dental assistance in Removable Prosthodontics against the pandemic COVID-19, Odontostomatologia 22 (2020).                                                                                                                                                                                                             | 0 |
| <b>CAREDDU R, 2020,<br/>G ITAL<br/>ENDODONZIA</b>                                | R. Careddu, M. Ciaschetti, G. Creavin, F. Molina, G. Plotino, COVID-19 and dental practice: Overview and protocols during pandemic, Giornale Italiano di Endodonzia 34(1) (2020) 13-19.                                                                                                                                               | 0 |
| <b>CARTER E, 2020,<br/>BRIT DENT J</b>                                           | E. Carter, C.C. Currie, A. Asuni, R. Goldsmith, G. Toon, C. Horridge, S. Simpson, C. Donnell, M. Greenwood, G. Walton, B. Cole, J. Durham, R. Holliday, The first six weeks-setting up a UK urgent dental care centre during the COVID-19 pandemic, British Dental Journal 228(11) (2020) 842-848.                                    | 0 |
| <b>CASCANTE-SEQUEI<br/>RA D, 2020,<br/>ODOVTOS INT J<br/>DENT S</b>              | D. Cascante-Sequeira, A.C. Ruiz-Imbert, F. Haiter-Neto, Oral and Maxillofacial Radiology During the Coronavirus Disease 2019 Pandemic: Recommendations for a Safer Practice, Odovtos International Journal of Dental Sciences 22(3) (2020) 93-102.                                                                                    | 0 |

|                                                          |                                                                                                                                                                                                                                                                                                                                                                                                          |   |
|----------------------------------------------------------|----------------------------------------------------------------------------------------------------------------------------------------------------------------------------------------------------------------------------------------------------------------------------------------------------------------------------------------------------------------------------------------------------------|---|
| <b>CAVALCANTI YW, 2020, PESQUI BRAS ODONTOPE</b>         | Y.W. Cavalcanti, R.O. da Silva, L.D. Ferreira, E.H.G. de Lucena, A. de Souza, D.D.B. Cavalcante, M.D. Meneghim, A.C. Pereira, Economic Impact of New Biosafety Recommendations for Dental Clinical Practice During COVID-19 Pandemic, Pesquisa Brasileira Em Odontopediatria E Clinica Integrada 20 (2020).                                                                                              | 0 |
| <b>CHAMORRO-PETRONACCI C, 2020, INT J ENV RES PUB HE</b> | C. Chamorro-Petronacci, C.M. Carreras-Presas, A. Sanz-Marchena, M.A. Rodriguez-Fernandez, J.M. Suarez-Quintanilla, B. Rivas-Mundina, J. Suarez-Quintanilla, M. Perez-Sayans, Assessment of the Economic and Health-Care Impact of COVID-19 (SARS-CoV-2) on Public and Private Dental Surgeries in Spain: A Pilot Study, International Journal of Environmental Research and Public Health 17(14) (2020). | 0 |
| <b>CHANG TY, 2020, J DENT SCI</b>                        | T.Y. Chang, G. Hong, C. Paganelli, P. Phantumvanit, W.J. Chang, Y.S. Shieh, M.L. Hsu, Innovation of dental education during COVID-19 pandemic, Journal of Dental Sciences (2020).                                                                                                                                                                                                                        | 0 |
| <b>CHANPONG B, 2020, ANESTH PROG</b>                     | B. Chanpong, M. Tang, A. Rosenczweig, P. Lok, R. Tang, Aerosol-Generating Procedures and Simulated Cough in Dental Anesthesia, Anesthesia progress (2020).                                                                                                                                                                                                                                               | 0 |
| <b>CHAVARRIA-BOLANOS D, 2020, ODOVTOS INT J DENT S</b>   | D. Chavarria-Bolanos, A. Gomez-Fernandez, C. Dittel-Jimenez, M. Montero-Aguilar, E-Learning in Dental Schools in the Times of COVID-19: A Review and Analysis of an Educational Resource in Times of the COVID-19 Pandemic, Odovtos International Journal of Dental Sciences 22(3) (2020) 69-86.                                                                                                         | 0 |
| <b>CHECCHI V, 2020, DENT CADMOS</b>                      | V. Checchi, L. Checchi, Surgical masks vs respirators: properties and indications for use, Dental Cadmos 88(7) (2020) 436-447.                                                                                                                                                                                                                                                                           | 0 |
| <b>CHEN XC, 2020, CHIN J DENT RES</b>                    | X.C. Chen, J.F. Ding, D.H. Xu, Z.G. Cai, X.E. Li, Z.D. Shi, C.B. Guo, Y.S. Zhou, Preventive and Control Measures for the ?Coronavirus Pandemic in Clinical Dentistry, Chinese journal of dental research 23(2) (2020) 99-104.                                                                                                                                                                            | 0 |
| <b>CHIGURUPATI R, 2020, J ORAL MAXIL SURG</b>            | R. Chigurupati, N. Panchal, A.M. Henry, H. Batal, A. Sethi, R. D'Innocenzo, P. Mehra, D.G. Krishnan, S.M. Roser, Considerations for Oral and Maxillofacial Surgeons in COVID-19 Era: Can We Sustain the Solutions to Keep Our Patients and Healthcare Personnel Safe?, Journal of Oral and Maxillofacial Surgery 78(8) (2020) 1241-1256.                                                                 | 0 |
| <b>CHOI SE, 2020, J DENT RES</b>                         | S.E. Choi, L. Simon, C.A. Riedy, J.R. Barrow, Modeling the Impact of COVID-19 on Dental Insurance Coverage and Utilization, Journal of Dental Research (2020).                                                                                                                                                                                                                                           | 0 |

|                                                       |                                                                                                                                                                                                                                                                                                           |   |
|-------------------------------------------------------|-----------------------------------------------------------------------------------------------------------------------------------------------------------------------------------------------------------------------------------------------------------------------------------------------------------|---|
| <b>CHOI SY, 2020, ORAL ONCOL</b>                      | S.Y. Choi, J. Shin, W. Park, N. Choi, J.S. Kim, C.I. Choi, J.H. Ko, C.R. Chung, Y.I. Son, H.S. Jeong, Safe surgical tracheostomy during the COVID-19 pandemic: A protocol based on experiences with Middle East Respiratory Syndrome and COVID-19 outbreaks in South Korea, Oral Oncology 109 (2020).     | 0 |
| <b>COSTA SM, 2020, J CRANIOFAC SURG</b>               | S.M. Costa, G.T. Lacerda, R.N. Villafort, R.L. Silveira, M.B.F. Amaral, What Do We Know About COVID-19?: Maxillofacial Surgeons Survey, The Journal of craniofacial surgery 31(6) (2020) e661-e663.                                                                                                       | 0 |
| <b>COTRIN P, 2020, AM J ORTHOD DENTOFACIAL ORTHOP</b> | P. Cotrin, R.M. Peloso, N.I.P. Pini, R.C. Oliveira, R.C.G. de Oliveira, F.P. Valarelli, K.M.S. Freitas, Urgencies and emergencies in orthodontics during the coronavirus disease 2019 pandemic: Brazilian orthodontists' experience, American Journal of Orthodontics and Dentofacial Orthopedics (2020). | 0 |
| <b>COTRIN P, 2020, ORTHOD CRANIOFAC RES</b>           | P. Cotrin, R.M. Peloso, R.C. Oliveira, R.C.G. de Oliveira, N.I.P. Pini, F.P. Valarelli, K.M.S. Freitas, Impact of coronavirus pandemic in appointments and anxiety/concerns of patients regarding orthodontic treatment, Orthodontics & Craniofacial Research (2020).                                     | 0 |
| <b>COULTHARD P, 2020, BRIT DENT J</b>                 | P. Coulthard, I. Hutchison, J.A. Bell, I.D. Coulthard, H. Kennedy, COVID-19, domestic violence and abuse, and urgent dental and oral and maxillofacial surgery care, British Dental Journal 228(12) (2020) 923-926.                                                                                       | 0 |
| <b>CRAWFORD E, 2020, J ORTHOD</b>                     | E. Crawford, N. Taylor, The effective use of an e-dentistry service during the COVID-19 crisis, Journal of orthodontics (2020).                                                                                                                                                                           | 0 |
| <b>CRIGHTON AJ, 2020, BRIT DENT J</b>                 | A.J. Crighton, C.T. McCann, E.J. Todd, A.J. Brown, Safe use of paracetamol and high-dose NSAID analgesia in dentistry during the COVID-19 pandemic, British Dental Journal 229(1) (2020) 15-18.                                                                                                           | 0 |
| <b>CRONIN AJ, 2020, BR J ORAL MAXILLOFAC SURG</b>     | A.J. Cronin, J.T.J. Lopez, R. Pabla, Evaluation of remote OMFS assessments in the era of pandemic COVID-19 control measures, British Journal of Oral and Maxillofacial Surgery 58(8) (2020) 1023-1028.                                                                                                    | 0 |
| <b>CRUZ TAPIA RO, 2020, SPEC CARE DENTIST</b>         | R.O. Cruz Tapia, A.J. Peraza Labrador, D.M. Guimaraes, L.H. Matos Valdez, Oral mucosal lesions in patients with SARS-CoV-2 infection. Report of four cases, Special care in dentistry (2020).                                                                                                             | 0 |
| <b>DA CUNHA AR, 2020, ORAL DIS</b>                    | A.R. da Cunha, J.L.F. Antunes, M.D. Martins, S. Petti, F.N. Hugo, The impact of the COVID-19 pandemic on oral biopsies in the Brazilian National, Oral diseases (2020).                                                                                                                                   | 0 |

|                                                                                                 |                                                                                                                                                                                                                                                                                                                                                                                                                                                                                                                                                                |   |
|-------------------------------------------------------------------------------------------------|----------------------------------------------------------------------------------------------------------------------------------------------------------------------------------------------------------------------------------------------------------------------------------------------------------------------------------------------------------------------------------------------------------------------------------------------------------------------------------------------------------------------------------------------------------------|---|
| <b>DADLANI S, 2020, INT J DENT</b>                                                              | S. Dadlani, SARS-CoV-2 Transmission in a Dental Practice in Spain: After the Outbreak, International Journal of Dentistry 2020 (2020).                                                                                                                                                                                                                                                                                                                                                                                                                         | 0 |
| <b>DE AMORIM LM, 2020, PESQUI BRAS ODONTOPE</b>                                                 | L.M. de Amorim, T.T. Maske, S.H. Ferreira, R.B. dos Santos, C.A. Feldens, P.F. Kramer, New Post-COVID-19 Biosafety Protocols in Pediatric Dentistry, Pesquisa Brasileira Em Odontopediatria E Clinica Integrada 20 (2020).                                                                                                                                                                                                                                                                                                                                     | 0 |
| <b>DE STEFANI A, 2020, INT J ENV RES PUB HE</b>                                                 | A. De Stefani, G. Bruno, S. Mutinelli, A. Gracco, COVID-19 Outbreak Perception in Italian Dentists, International Journal of Environmental Research and Public Health 17(11) (2020).                                                                                                                                                                                                                                                                                                                                                                           | 0 |
| <b>DEL CASTILLO PARDO DE VERA JOS LUIS, 2020, REVISTA ESPAOLA DE CIRUGA ORAL Y MAXILOFACIAL</b> | J.L. del Castillo Pardo de Vera, J.L. Cebrián Carretero, J. Guiñales Díaz de Cevallos, P. Garrido Ortega, J. Noguera Tomás, J. Manuel Muñoz Caro, T. González Otero, M.J. Morán Soto, A. Malet Contreras, C. Sánchez Gallego-Albertos, J.C. Figueira Iglesias, M.J. Asensio Martín, J.M. Añón Elizalde, M. Burgueño García, Traqueotomías en pacientes críticos durante la pandemia por COVID-19. Estudio preliminar de nuestra experiencia en el Hospital Universitario La Paz de Madrid, Revista Española de Cirugía Oral y Maxilofacial 42(2) (2020) 60-68. | 0 |
| <b>DESERRES JJ, 2020, J CRANIOFAC SURG</b>                                                      | J.J. DeSerres, S.Z. Al-Shaqsi, O.M. Antonyshyn, J.A. Fialkov, Best Practice Guidelines for the Management of Acute Craniomaxillofacial Trauma, The Journal of craniofacial surgery 31(6) (2020) e626-e630.                                                                                                                                                                                                                                                                                                                                                     | 0 |
| <b>DI BARTOLOMEO M, 2020, J ORAL SCI</b>                                                        | M. Di Bartolomeo, A. Pellacani, S. Negrello, L. Chiarini, A. Anesi, Emerging challenges and possible strategies in maxillo-facial and oral surgery, Journal of oral science (2020).                                                                                                                                                                                                                                                                                                                                                                            | 0 |
| <b>DIEGRITZ C, 2020, CLIN ORAL INVEST</b>                                                       | C. Diegritz, J. Manhart, K. Bucher, B. Grabein, G. Schuierer, J. Kuhnisch, K.H. Kunzelmann, R. Hickel, C. Fotiadou, A detailed report on the measures taken in the Department of Conservative Dentistry and Periodontology in Munich at the beginning of the COVID-19 outbreak, Clinical Oral Investigations 24(8) (2020) 2931-2941.                                                                                                                                                                                                                           | 0 |
| <b>DUCEAC LD, 2020, INT J MED DENT</b>                                                          | L.D. Duceac, L. Eva, M. Dabija, T. Ciuhodaru, C. Gutu, L. Romila, S. Nazarie, Prevention and Limitation of Coronavirus Sars-Cov-2 Cases in Hospitals and Dental Medicine Offices, International Journal of Medical Dentistry 24(2) (2020) 149-156.                                                                                                                                                                                                                                                                                                             | 0 |
| <b>DURUK GLSM, 2020, BRAZILIAN ORAL RESEARCH</b>                                                | G. Duruk, Z.e. GÜMÜŞBoğa, C. Çolak, Investigation of Turkish dentists clinical attitudes and behaviors towards the COVID-19 pandemic: a survey study, Brazilian Oral Research 34 (2020) e054.                                                                                                                                                                                                                                                                                                                                                                  | 0 |

|                                                                    |                                                                                                                                                                                                                                                                                                       |   |
|--------------------------------------------------------------------|-------------------------------------------------------------------------------------------------------------------------------------------------------------------------------------------------------------------------------------------------------------------------------------------------------|---|
| <b>DZIEDZIC A, 2020, ORAL DIS</b>                                  | A. Dziedzic, E.M. Varoni, Challenges of oral medicine specialists at the time of COVID-19 pandemic, Oral Diseases (2020).                                                                                                                                                                             | 0 |
| <b>ELLEDGE R, 2020, BR J ORAL MAXILLOFAC SURG</b>                  | R. Elledge, R. Williams, C. Fowell, J. Green, Maxillofacial education in the time of COVID-19: the West Midlands experience, British Journal of Oral and Maxillofacial Surgery (2020).                                                                                                                | 0 |
| <b>ELSAYED SA, 2020, PESQUI BRAS ODONTOPEDIATRIA A CLIN INTEGR</b> | S.A. Elsayed, O. Abu-Hammad, A.B. Alolayan, N. Althagafi, Y. Ayed, Y.S. Eldeen, N. Dar-Odeh, Getting to Know SARS-CoV-2: Towards a Better Understanding of the Factors Influencing Transmission, Pesquisa Brasileira Em Odontopediatria E Clinica Integrada 20 (2020).                                | 0 |
| <b>EMERY AR, 2020, J ORAL MAXILLOFAC SURG</b>                      | A.R. Emery, O. Saniukovich, A.L. Lang, R.J. Tannyhill, J. Wang, A Novel Approach to Fiberoptic Intubation in Patients With Coronavirus Disease 2019, Journal of oral and maxillofacial surgery (2020).                                                                                                | 0 |
| <b>FRANCO JB, 2020, BRAZ DENT SCI</b>                              | J.B. Franco, P.F. Ribas, L.A.S. Valente JÃnior, D.T. Matias, B.L.R. Varotto, C.R. Hamza, J.F. de AraÃJo, M. Peres, Hospital dentistry and dental care for patients with special needs: Dental approach during covid-19 pandemic, Brazilian Dental Science 23(2) (2020) 1-9.                           | 0 |
| <b>GALLAGHER JE, 2020, BRIT DENT J</b>                             | J.E. Gallagher, I. Johnson, J.H. Verbeek, J.E. Clarkson, N. Innes, Relevance and paucity of evidence: a dental perspective on personal protective equipment during the COVID-19 pandemic, British Dental Journal 229(2) (2020) 121-124.                                                               | 0 |
| <b>GAMBARINI G, 2020, J CONTEMP DENTAL PRACT</b>                   | G. Gambarini, M. Galli, E. Gambarini, D. Di Nardo, M. Seracchiani, F.V. Obino, S. Patil, S. Bhandi, G. Miccoli, L. Testarelli, Fine aerosols and perceived risk of COVID-19 among Italian dental practitioners: An experimental survey, Journal of Contemporary Dental Practice 21(6) (2020) 599-603. | 0 |
| <b>GANDOLFI MG, 2020, DENT CADMOS</b>                              | M.G. Gandolfi, A. Spinelli, F. Zamparini, V. Sambri, C. Prati, Coronavirus contamination in dental clinics. New systems and operating devices, Dental Cadmos 88(6) (2020) 368-378.                                                                                                                    | 0 |
| <b>GARCA-CAMBA P, 2020, AM J ORTHOD DENTOFACIAL ORTHOP</b>         | P. GarcÃa-Camba, M. Marcianes, M. Varela Morales, Changes in orthodontics during the COVID-19 pandemic that have come to stay, American Journal of Orthodontics and Dentofacial Orthopedics (2020).                                                                                                   | 0 |



|                                                                                     |                                                                                                                                                                                                                                                                                                                                                             |   |
|-------------------------------------------------------------------------------------|-------------------------------------------------------------------------------------------------------------------------------------------------------------------------------------------------------------------------------------------------------------------------------------------------------------------------------------------------------------|---|
| <b>GASPAR GD, 2020, PESQUI BRAS ODONTOPE</b>                                        | G.D. Gaspar, N. Figueiredo, E.H.G. de Lucena, C.A.S. Ceissler, R.P. Cavalcanti, P.S.A. de Goes, Characterization of Dental Surgeons of Pernambuco State in the COVID-19 Pandemic Context: Preliminary Data, Pesquisa Brasileira Em Odontopediatria E Clinica Integrada 20 (2020).                                                                           | 0 |
| <b>GASPARONI A, 2020, BRAZ DENT SCI</b>                                             | A. Gasparoni, M. Kanellis, Covid-19 and dental emergencies: Reflections on teledentistry, Brazilian Dental Science 23(2) (2020) 1-4.                                                                                                                                                                                                                        | 0 |
| <b>GASPARRO R, 2020, INT J ENV RES PUB HE</b>                                       | R. Gasparro, C. Scandurra, N.M. Maldonato, P. Dolce, V. Bochicchio, A. Valletta, G. Sammartino, P. Sammartino, M. Mariniello, A.E. di Lauro, G. Marenzi, Perceived Job Insecurity and Depressive Symptoms among Italian Dentists: The Moderating Role of Fear of COVID-19, International Journal of Environmental Research and Public Health 17(15) (2020). | 0 |
| <b>GONZALEZ-CICCA RELI LF, 2020, ORAL MAXILLOFAC SURG CASES</b>                     | L.F. Gonzalez-Cicarelli, J. Nilson, D. Oreadi, D. Fakitsas, P. Sekhar, S.A. Quraishi, Reducing transmission of COVID-19 using a continuous negative pressure operative field barrier during oral maxillofacial surgery, Oral and Maxillofacial Surgery Cases 6(3) (2020).                                                                                   | 0 |
| <b>GONZLEZ-OLMO MARA JOS, 2020, BRAZILIAN ORAL RESEARCH</b>                         | M.J. GonzÁLez-Olmo, A.R. Ortega-MartÍNez, B. Delgado-Ramos, M. Romero-Maroto, M. Carrillo-Diaz, Perceived vulnerability to Coronavirus infection: impact on dental practice, Brazilian Oral Research 34 (2020) e044.                                                                                                                                        | 0 |
| <b>GONZLEZ-QUINTA NILLA DAVID, 2020, INTERNATIONAL JOURNAL OF ODONTOSTOMATOLOGY</b> | D. González-Quintanilla, M. Santos-López, Medidas Preventivas y Consideraciones para la Práctica de Cirugía Oral durante COVID-19, International journal of odontostomatology 14(3) (2020) 338-341.                                                                                                                                                         | 0 |
| <b>GOSWAMI M, 2020, J ORAL BIOL CRANIOFAC RES</b>                                   | M. Goswami, S. Chawla, Time to restart: A comparative compilation of triage recommendations in dentistry during the Covid â19 pandemic, Journal of Oral Biology and Craniofacial Research 10(4) (2020) 374-384.                                                                                                                                             | 0 |
| <b>GOTTSAUER MJ, 2020, CLIN ORAL INVESTIG</b>                                       | M.J. Gottsauner, I. Michaelides, B. Schmidt, K.J. Scholz, W. Buchalla, M. Widbiller, F. Hitzenbichler, T. Ettl, T.E. Reichert, C. Bohr, V. Vielsmeier, F. Cieplik, A prospective clinical pilot study on the effects of a hydrogen peroxide mouthrinse, Clinical oral investigations (2020).                                                                | 0 |

|                                                    |                                                                                                                                                                                                                                         |   |
|----------------------------------------------------|-----------------------------------------------------------------------------------------------------------------------------------------------------------------------------------------------------------------------------------------|---|
| <b>GRAHAM C, 2020, BR J ORAL MAXILLOFAC SURG</b>   | C. Graham, K.D. Mizen, OMFS moving into the recovery phase of the COVID-19 pandemic - a survey on general practice for elective local anaesthetic procedures, British Journal of Oral and Maxillofacial Surgery 58(8) (2020) 1040-1045. | 0 |
| <b>GROSSMAN S, 2020, BRIT DENT J</b>               | S. Grossman, P. Sandhu, C. Sproat, V. Patel, Provision of dental services at a single institution in the UK's epicentre during the COVID-19 pandemic, British Dental Journal 228(12) (2020) 964-970.                                    | 0 |
| <b>GUO X, 2020, CHIN J DENT RES</b>                | X. Guo, Y. Han, Z.J. Liu, S.F. Li, G.D. Huang, H.W. Liu, Expert Recommendations for Prevention, Treatment and Care of Oral Ulcers and Other, Chinese journal of dental research 23(2) (2020) 95-98.                                     | 0 |
| <b>GUO Y, 2020, AM J ORTHOD DENTOFACIAL ORTHOP</b> | Y.W. Guo, Y. Jing, Y.S. Wang, A. To, S.F. Du, L.Z. Wang, D. Bai, Control of SARS-CoV-2 transmission in orthodontic practice, American Journal of Orthodontics and Dentofacial Orthopedics 158(3) (2020) 321-329.                        | 0 |
| <b>GUPTA A, 2020, J MAXILLOFAC ORAL SU</b>         | A. Gupta, P. Sharma, Management Strategies for Cancer Patients in the Time of COVID-19 Pandemic, Journal of Maxillofacial & Oral Surgery 19(3) (2020) 473-474.                                                                          | 0 |
| <b>HAMEDANI S, 2020, ORAL RADIOL</b>               | S. Hamedani, N. Farshidfar, The practice of oral and maxillofacial radiology during COVID-19 outbreak, Oral Radiology (2020).                                                                                                           | 0 |
| <b>HAQUE M, 2020, PESQUI BRAS ODONTOPE</b>         | M. Haque, The COVID-19 Pandemic - A Global Public Health Crisis: A Brief Overview Regarding Pharmacological Interventions, Pesquisa Brasileira Em Odontopediatria E Clinica Integrada 20 (2020).                                        | 0 |
| <b>HARDIE JA, 2020, BRIT J ORAL MAX SURG</b>       | J.A. Hardie, P.A. Brennan, Are you surgically current? Lessons from aviation for returning to non-urgent surgery following COVID-19, British Journal of Oral and Maxillofacial Surgery 58(7) (2020) 843-847.                            | 0 |
| <b>HARIKRISHNAN P, 2020, J CRANIOFAC SURG</b>      | P. Harikrishnan, Gustatory Dysfunction as an Early Symptom in COVID-19 Screening, The Journal of craniofacial surgery 31(6) (2020) e656-e658.                                                                                           | 0 |
| <b>HARIKRISHNAN P, 2020, J CRANIOFAC SURG-a</b>    | P. Harikrishnan, Saliva as a Potential Diagnostic Specimen for COVID-19 Testing, The Journal of craniofacial surgery 31(6) (2020) e653-e655.                                                                                            | 0 |

|                                                     |                                                                                                                                                                                                                                                        |   |
|-----------------------------------------------------|--------------------------------------------------------------------------------------------------------------------------------------------------------------------------------------------------------------------------------------------------------|---|
| <b>HERRON JBT, 2020, BR J ORAL MAXILLOFAC SURG</b>  | J.B.T. Herron, J. Dennis, P.A. Brennan, Coronavirus antibody positive tests and continued use of personal protective equipment throughout the pandemic, British Journal of Oral and Maxillofacial Surgery 58(8) (2020) 1014-1016.                      | 0 |
| <b>HERZBERG MC, 2020, JDR CLIN TRANSL RES</b>       | M.C. Herzberg, A COVID-19 Rapid-Response Research Agenda, Jdr Clinical & Translational Research 5(4) (2020) 293-296.                                                                                                                                   | 0 |
| <b>HUA CG, 2020, HUA XI KOU QIANG YI XUE ZA ZHI</b> | C.G. Hua, Z.Q. Liu, Q. Wang, Z. Yang, Q.H. Xu, J. Zhang, Strategy of dental clinics to cope with the epidemic period of infectious diseases, Hua xi kou qiang yi xue za zhi = Huaxi kouqiang yixue zazhi = West China journal of 38(2) (2020) 117-121. | 0 |
| <b>HUANG C, 2020, SHANGHAI KOU QIANG YI XUE</b>     | C. Huang, C.J. Shi, F. Xu, H. Zhen, H.X. Lu, Z.Y. Zhang, Instructions for clinical research of oral diseases under the first level response, Shanghai kou qiang yi xue = Shanghai journal of stomatology 29(2) (2020) 113-117.                         | 0 |
| <b>HUNTLEY RE, 2020, J ORAL MAXIL SURG</b>          | R.E. Huntley, D.C. Ludwig, J.K. Dillon, Early Effects of COVID-19 on Oral and Maxillofacial Surgery Residency Training-Results From a National Survey, Journal of Oral and Maxillofacial Surgery 78(8) (2020) 1257-1267.                               | 0 |
| <b>ILHAN B, 2020, ORAL RADIOL</b>                   | B. Ilhan, I.S. Bayrakdar, K. Orhan, Dental radiographic procedures during COVID-19 outbreak and normalization period: recommendations on infection control, Oral Radiology (2020).                                                                     | 0 |
| <b>ILYAS N, 2020, BRIT DENT J</b>                   | N. Ilyas, M. Agel, J. Mitchell, S. Sood, COVID-19 pandemic: the first wave-an audit and guidance for paediatric dentistry, British Dental Journal 228(12) (2020) 927-931.                                                                              | 0 |
| <b>ISIEKWE IG, 2020, J WORLD FED ORTHOD</b>         | I.G. Isiekwe, T.E. Adeyemi, E.A. Aikins, O.D. Umeh, Perceived impact of the COVID-19 pandemic on orthodontic practice by orthodontists and orthodontic residents in Nigeria, Journal of the World Federation of Orthodontists 9(3) (2020) 123-128.     | 0 |
| <b>IZZETTI R, 2020, ORAL DIS</b>                    | R. Izzetti, S. Gennai, M. Nisi, A. Barone, M.R. Giuca, M. Gabriele, F. Graziani, A perspective on dental activity during COVID-19: the Italian survey, Oral diseases (2020).                                                                           | 0 |
| <b>JEVON P, 2020, BRIT DENT J</b>                   | P. Jevon, S. Shamsi, COVID-19 and medical emergencies in the dental practice, British Dental Journal 229(1) (2020) 19-24.                                                                                                                              | 0 |

|                                                              |                                                                                                                                                                                                                                                                                                                                   |   |
|--------------------------------------------------------------|-----------------------------------------------------------------------------------------------------------------------------------------------------------------------------------------------------------------------------------------------------------------------------------------------------------------------------------|---|
| <b>JIANG Y, 2020,<br/>ORAL DIS</b>                           | Y.Y. Jiang, T.Y. Tang, L. Mei, H. Li, COVID-19 affected patients' utilization of dental care service, <i>Oral Diseases</i> (2020).                                                                                                                                                                                                | 0 |
| <b>JUREMA ALB, 2020,<br/>BRAZ DENT SCI</b>                   | A.L.B. Jurema, R.S. Rocha, M.C. Mailart, M.Y. de Souza, S.E.P. Gonçalves, T.M.F. Caneppele, E. Bresciani, Protocols to control contamination and strategies to optimize the clinical practice in restorative dentistry during the COVID-19 pandemic, <i>Brazilian Dental Science</i> 23(2) (2020) 1-10.                           | 0 |
| <b>KANAPARTHI A,<br/>2020, J ORAL BIOL<br/>CRANIOFAC RES</b> | A. Kanaparthi, D. Dukkireddy, H. Gopalaiah, S.P.R. Kesary, T. Katne, R. Gantala, Awareness of COVID 19 pandemic among dental practitioners of Telangana state, India: A cross sectional survey, <i>Journal of Oral Biology and Craniofacial Research</i> 10(4) (2020) 484-489.                                                    | 0 |
| <b>KERAWALA C,<br/>2020, BRIT J ORAL<br/>MAX SURG</b>        | C. Kerawala, F. Riva, Aerosol-generating procedures in head and neck surgery can we improve practice after COVID-19?, <i>British Journal of Oral and Maxillofacial Surgery</i> 58(6) (2020) 704-707.                                                                                                                              | 0 |
| <b>KEYHAN SO, 2020,<br/>MAX PLAST<br/>RECONSTR S</b>         | S.O. Keyhan, H.R. Fallahi, A. Motamedi, V. Khoshkam, P. Mehryar, O. Moghaddas, B. Cheshmi, P. Firoozi, P. Yousefi, B. Houshmand, Reopening of dental clinics during SARS-CoV-2 pandemic: an evidence-based review of literature for clinical interventions, <i>Maxillofacial Plastic and Reconstructive Surgery</i> 42(1) (2020). | 0 |
| <b>KHANAGAR SB,<br/>2020, J CONTEMP<br/>DENT PRACT</b>       | S.B. Khanagar, A. Al-Ehaideb, S. Vishwanathaiah, P.C. Maganur, S. Varadarajan, S. Patil, Depression, Anxiety, and Psychological Distress among Healthcare Providers during, <i>Journal of contemporary dental practice</i> 21(5) (2020) 471-472.                                                                                  | 0 |
| <b>KOCHHAR AS, 2020,<br/>INT J DENT</b>                      | A.S. Kochhar, R. Bhasin, G.K. Kochhar, H. Dadlani, COVID-19 Pandemic and Dental Practice, <i>International Journal of Dentistry</i> 2020 (2020).                                                                                                                                                                                  | 0 |
| <b>KOGA-ITO CY, 2020,<br/>BRAZ DENT SCI</b>                  | C.Y. Koga-Ito, H.T. Koga-Ito, A.G. Sampaio, M.R.C. Vegian, Understanding SARS CoV-2 biology to win COVID-19 battle, <i>Brazilian Dental Science</i> 23(2) (2020) 1-12.                                                                                                                                                            | 0 |
| <b>KOLETSI D, 2020, J<br/>DENT RES</b>                       | D. Koletsi, G.N. Belibasakis, T. Eliades, Interventions to Reduce Aerosolized Microbes in Dental Practice: A Systematic Review with Network Meta-analysis of Randomized Controlled Trials, <i>Journal of Dental Research</i> (2020).                                                                                              | 0 |
| <b>KOUTRAS S, 2020,<br/>SOUTH AFRICAN<br/>DENTAL JOURNAL</b> | S. Koutras, S. Govender, N.H. Wood, P.D. Motloba, COVID-19 pandemic and the dental practice, <i>South African Dental Journal</i> 75(3) (2020) 119-125.                                                                                                                                                                            | 0 |

|                                                      |                                                                                                                                                                                                                                                         |   |
|------------------------------------------------------|---------------------------------------------------------------------------------------------------------------------------------------------------------------------------------------------------------------------------------------------------------|---|
| <b>KWAK EJ, 2020, J DENT SCI</b>                     | E.J. Kwak, J. Kim, H. Perinpanayagam, K.Y. Kum, Guidance for dental treatment of patients with disabilities during COVID-19 pandemic, Journal of Dental Sciences (2020).                                                                                | 0 |
| <b>LEE YL, 2020, J DENT SCI</b>                      | Y.L. Lee, D.C. Chu, S.Y. Chou, H.Y. Hu, S.J. Huang, Y.F. Yen, Dental care and infection-control procedures during the COVID-19 pandemic: The experience in Taipei City Hospital, Taiwan, Journal of Dental Sciences 15(3) (2020) 369-372.               | 0 |
| <b>LEON S, 2020, JDR CLIN TRANSL RES</b>             | S. Leon, R.A. Giacaman, COVID-19 and Inequities in Oral Health Care for Older People: An Opportunity for Emerging Paradigms, Jdr Clinical & Translational Research (2020).                                                                              | 0 |
| <b>LI DTS, 2020, ORAL DIS</b>                        | D.T.S. Li, L.P. Samaranayake, Y.Y. Leung, P. Neelakantan, Facial protection in the era of COVID-19: A narrative review, Oral Diseases (2020).                                                                                                           | 0 |
| <b>LI ZY, 2020, ZHONGHUA KOU QIANG YI XUE ZA ZHI</b> | Z.Y. Li, L.Y. Meng, The prevention and control of a new coronavirus infection in department of, Zhonghua kou qiang yi xue za zhi = Zhonghua kouqiang yixue zazhi = Chinese journal 55(0) (2020) E001.                                                   | 0 |
| <b>LIAO Q, 2020, SHANGHAI KOU QIANG YI XUE</b>       | Q. Liao, Z.R. Li, J. Tao, L. Jiang, Q. Du, Y.Q. Zhu, Management and prevention of dental emergency during corona virus disease 2019, Shanghai kou qiang yi xue = Shanghai journal of stomatology 29(2) (2020) 123-126.                                  | 0 |
| <b>LITTLE R, 2020, BRIT DENT J</b>                   | R. Little, J. Howell, P. Nixon, COVID-19 and beyond: implications for dental radiography, British Dental Journal 229(2) (2020) 105-109.                                                                                                                 | 0 |
| <b>LIU R, 2020, J DENT RES</b>                       | R. Liu, S. Yi, J. Zhang, Z. Lv, C. Zhu, Y. Zhang, Viral Load Dynamics in Sputum and Nasopharyngeal Swab in Patients with COVID-19, Journal of Dental Research (2020).                                                                                   | 0 |
| <b>LIU XQ, 2020, EUR J DENT EDUC</b>                 | X.Q. Liu, J.F. Zhou, L. Chen, Y. Yang, J.G. Tan, Impact of COVID-19 epidemic on live online dental continuing education, European Journal of Dental Education (2020).                                                                                   | 0 |
| <b>LONG L, 2020, BRIT J ORAL MAX SURG</b>            | L. Long, K. Corsar, The COVID-19 effect: number of patients presenting to The Mid Yorkshire Hospitals OMFS team with dental infections before and during The COVID-19 outbreak, British Journal of Oral and Maxillofacial Surgery 58(6) (2020) 713-714. | 0 |

|                                                                                         |                                                                                                                                                                                                                                                                                      |   |
|-----------------------------------------------------------------------------------------|--------------------------------------------------------------------------------------------------------------------------------------------------------------------------------------------------------------------------------------------------------------------------------------|---|
| <b>LV N, 2020, J DENT SCI</b>                                                           | N. Lv, M. Sun, A. Polonowita, L. Mei, G. Guan, Management of oral medicine emergencies during COVID-19: A study to develop practise guidelines, Journal of Dental Sciences (2020).                                                                                                   | 0 |
| <b>MACHADO RENATO ASSIS, 2020, BRAZILIAN ORAL RESEARCH</b>                              | R.A. Machado, P.R.F. Bonan, D.E.d.C. Perez, H. Martelli JÚNior, COVID-19 pandemic and the impact on dental education: discussing current and future perspectives, Brazilian Oral Research 34 (2020) e083.                                                                            | 0 |
| <b>MACIEL PP, 2020, PESQUI BRAS ODONTOPE</b>                                            | P.P. Maciel, H. Martelli, D.R.B. Martelli, R.A. Machado, P.V. de Andrade, D.E.D. Perez, P.R.F. Bonan, COVID-19 Pandemic: Oral Repercussions and its Possible Impact on Oral Health, Pesquisa Brasileira Em Odontopediatria E Clinica Integrada 20 (2020).                            | 0 |
| <b>MAHENDRAN K, 2020, BRIT DENT J</b>                                                   | K. Mahendran, S. Patel, C. Sproat, Psychosocial effects of the COVID-19 pandemic on staff in a dental teaching hospital, British Dental Journal 229(2) (2020) 127-132.                                                                                                               | 0 |
| <b>MARTINA S, 2020, INT J ENV RES PUB HE</b>                                            | S. Martina, A. Amato, R. Rongo, M. Caggiano, M. Amato, The Perception of COVID-19 among Italian Dentists: An Orthodontic Point of View, International Journal of Environmental Research and Public Health 17(12) (2020).                                                             | 0 |
| <b>MARTINEZ-LAMAS LM, 2020, ORAL DIS</b>                                                | L. Martinez Lamas, P. Diz Dios, M.T. Perez Rodriguez, V. Del Campo Perez, J.J.C. Alvargonzalez, A.M. Lopez Dominguez, J. Fernandez Feijoo, M. Diniz Freitas, J. Limeres Posse, Is povidone iodine mouthwash effective against SARS-CoV-2? First in vivo tests, Oral Diseases (2020). | 0 |
| <b>MARTINS-CHAVES ROBERTA RAYRA, 2020, BRAZILIAN ORAL RESEARCH</b>                      | R.R. Martins-Chaves, C.C. Gomes, R.S. Gomez, Immunocompromised patients and coronavirus disease 2019: a review and recommendations for dental health care, Brazilian Oral Research 34 (2020) e048.                                                                                   | 0 |
| <b>MARTNEZ-CAMUS DANIELA CATALINA, 2020, INTERNATIONAL JOURNAL OF ODONTOSTOMATOLOGY</b> | D.C. Martínez-Camus, S.R. Yévenes-Huaiquinao, Atención Dental Durante la Pandemia COVID-19, International journal of odontostomatology 14(3) (2020) 288-295.                                                                                                                         | 0 |

|                                                                                 |                                                                                                                                                                                                                                                                                                                                                                                                                                                                                                                                                                           |   |
|---------------------------------------------------------------------------------|---------------------------------------------------------------------------------------------------------------------------------------------------------------------------------------------------------------------------------------------------------------------------------------------------------------------------------------------------------------------------------------------------------------------------------------------------------------------------------------------------------------------------------------------------------------------------|---|
| <b>MATTOS FLVIO FREITAS, 2020, BRAZILIAN ORAL RESEARCH</b>                      | F.F. Mattos, I.A. Pordeus, COVID-19: a new turning point for dental practice, Brazilian Oral Research 34 (2020) e085.                                                                                                                                                                                                                                                                                                                                                                                                                                                     | 0 |
| <b>MEDEIROS MATHEUS SIMES, 2020, RGO - REVISTA GACHA DE ODONTOLOGIA</b>         | M.S.e. Medeiros, H.L.F.d. Santos, J.O. Barreto, J.C.P. Freire, E. Dias-Ribeiro, COVID-19 pandemic impacts to Dentistry, RGO - Revista Gaúcha de Odontologia 68 (2020) e20200021.                                                                                                                                                                                                                                                                                                                                                                                          | 0 |
| <b>MELIN-RIVAS ANDRS, 2020, INTERNATIONAL JOURNAL OF ODONTOSTOMATOLOGY</b>      | A. Melián-Rivas, P. Calcumil-Herrera, C. Boin-Bakit, R. Carrasco-Soto, Detección de COVID -19 (SARS-CoV-2) Mediante la Saliva: Una Alternativa Diagnóstica poco Invasiva, International journal of odontostomatology 14(3) (2020) 316-320.                                                                                                                                                                                                                                                                                                                                | 0 |
| <b>MIJIRITSKY E, 2020, INT J ENV RES PUB HE</b>                                 | E. Mijiritsky, Y. Hamama-Raz, F. Liu, A.N. Datarkar, L. Mangani, J. Caplan, A. Shacham, R. Kolerman, O. Mijiritsky, M. Ben-Ezra, M. Shacham, Subjective Overload and Psychological Distress among Dentists during COVID-19, International Journal of Environmental Research and Public Health 17(14) (2020).                                                                                                                                                                                                                                                              | 0 |
| <b>MONJE GIL F., 2020, REVISTA ESPAOLA DE CIRUGA ORAL Y MAXILOFACIAL</b>        | F. Monje Gil, J.L. Cebrián Carretero, J.L. López-Cedrún Cembranos, M. Redondo Alamillos, A. Valdés Beltrán, F. Almeida Parra, E. García, J.C. Díaz-Mauri?o y Garrido-Lestache, M.A. Tousidonis Rial, L. Ruiz-Laza, J. Sastre Pérez, A. Ranz Colio, F. Acebal Blanco, J. Rubio-Palau, M. de Pedro Marina, L.M. Redondo González, A. Pla Esparza, P. Infante-Cossío, Manejo de pacientes en cirugía oral y maxilofacial durante el periodo de crisis y de control posterior de la pandemia de COVID-19, Revista Espa?ola de Cirugía Oral y Maxilofacial 42(2) (2020) 51-59. | 0 |
| <b>MONTALLI VICTOR ANGELO MARTINS, 2020, RGO - REVISTA GACHA DE ODONTOLOGIA</b> | V.A.M. Montalli, A.S. Garcez, G.A.M. Montalli, F.M.G. FranÇA, S.S. Suzuki, L.M.T. Mian, R.H.L. Motta, M.H. Napimoga, J.L.C. Junqueira, Individual biosafety barrier in dentistry: an alternative in times of covid-19. Preliminary study, RGO - Revista Gaúcha de Odontologia 68 (2020) e20200088.                                                                                                                                                                                                                                                                        | 0 |

|                                                                                                         |                                                                                                                                                                                                                                                                               |   |
|---------------------------------------------------------------------------------------------------------|-------------------------------------------------------------------------------------------------------------------------------------------------------------------------------------------------------------------------------------------------------------------------------|---|
| <b>MOOSAVI MS, 2020,<br/>J ORAL<br/>MICROBIOL</b>                                                       | M.S. Moosavi, P. Aminishakib, M. Ansari, Antiviral mouthwashes: possible benefit for COVID-19 with evidence-based approach, <i>Journal of Oral Microbiology</i> 12(1) (2020).                                                                                                 | 0 |
| <b>MORALES-ESPINOS<br/>A ROLANDO, 2020,<br/>INTERNATIONAL<br/>JOURNAL OF<br/>ODONTOSTOMATO<br/>LOGY</b> | R. Morales-Espinosa, La Saliva como Biomuestra para Diagnóstico de Infección por SARS-CoV-2: Una Revisión, <i>International journal of odontostomatology</i> 14(3) (2020) 327-330.                                                                                            | 0 |
| <b>MOREIRA MS, 2020,<br/>ORAL DIS</b>                                                                   | M.S. Moreira, I.L.I. Neves, C.Y.S. de Bernoche, G. Sarra, M.A. dos Santos-Paul, F.C.N. da Silva, G.T. Schroter, T.C.P. Montano, C.M.A. de Carvalho, R.S. Neves, Bilateral paresthesia associated with cardiovascular disease and COVID-19, <i>Oral Diseases</i> (2020).       | 0 |
| <b>MUNIZ IAF, 2020,<br/>PESQUI BRAS<br/>ODONTOPEDIATRI<br/>A CLIN INTEGR</b>                            | I.D.F. Muniz, L. Van der Linden, M.E. Santos, R.C.D. Rodrigues, J.R. de Souza, R.A.D. Oliveira, L.R.C. Castellano, P.R.F. Bonan, SARS-CoV-2 and Saliva as a Diagnostic Tool: A Real Possibility, <i>Pesquisa Brasileira Em Odontopediatria E Clinica Integrada</i> 20 (2020). | 0 |
| <b>NADANOVSKY<br/>PAULO, 2020,<br/>BRAZILIAN ORAL<br/>RESEARCH</b>                                      | P. Nadanovsky, A.P.P.d. Santos, Strategies to deal with the COVID-19 pandemic, <i>Brazilian Oral Research</i> 34 (2020) e068.                                                                                                                                                 | 0 |
| <b>NAIR AKR, 2020,<br/>REV CUBA<br/>ESTOMATOL</b>                                                       | A.K.R. Nair, C.S. Karumaran, D. Kattula, R. Thavarajah, A.A. Mohandoss, Stress levels of indian endodontists during COVID-19 pandemic, <i>Revista Cubana de Estomatologia</i> 57(3) (2020) 1-18.                                                                              | 0 |
| <b>NARDONE M, 2020,<br/>ORAL DIS</b>                                                                    | M. Nardone, A. Cordone, S. Petti, Occupational COVID-19 risk to dental staff working in a public dental unit in the outbreak epicenter, <i>Oral diseases</i> (2020). <a href="https://doi.org/10.1111/odi.13632">https://doi.org/10.1111/odi.13632</a>                        | 0 |
| <b>NAVARRO DM,<br/>2020, REV CUBA<br/>ESTOMATOL</b>                                                     | D.M. Navarro, Actions taken by dental care providers in relation to COVID-19, <i>Revista Cubana de Estomatologia</i> 57(1) (2020).                                                                                                                                            | 0 |



|                                                                                |                                                                                                                                                                                                                                                    |   |
|--------------------------------------------------------------------------------|----------------------------------------------------------------------------------------------------------------------------------------------------------------------------------------------------------------------------------------------------|---|
| <b>NAVOS BV, 2020, ODONTOESTOMATOLOGIA</b>                                     | B.V. Navos, Endodontic treatments in the context of the COVID-19 pandemic, <i>Odontostomatologia</i> 22 (2020).                                                                                                                                    | 0 |
| <b>OEPPEEN RS, 2020, BRIT J ORAL MAX SURG</b>                                  | R.S. Oeppen, G. Shaw, P.A. Brennan, Human factors recognition at virtual meetings and video conferencing: how to get the best performance from yourself and others, <i>British Journal of Oral and Maxillofacial Surgery</i> 58(6) (2020) 643-646. | 0 |
| <b>OMARI AA, 2020, J CRANIOFAC SURG</b>                                        | A.A. Omari, R. Al-Ashqar, A. Nuseir, H. Al Balas, H. Allan, Y. Kanaan, F. Alzoubi, Overview of Upper Airway Management During COVID-19 Outbreak: Head and Neck, <i>The Journal of craniofacial surgery</i> 31(6) (2020) e644-e649.                 | 0 |
| <b>OZDEDE M, 2020, J STOMATOL</b>                                              | M. Ozdede, S.C. Sahin, Views and anxiety levels of Turkish dental students during the covid-19 pandemic, <i>Journal of Stomatology</i> 73(3) (2020) 123-128.                                                                                       | 0 |
| <b>PAJPANI M, 2020, BR J ORAL MAXILLOFAC SURG</b>                              | M. Pajpani, K. Patel, A. Bendkowski, P. Stenhouse, Rapid response: activity from a hospital based Urgent Dental Care Centre during the COVID-19 pandemic, <i>British Journal of Oral and Maxillofacial Surgery</i> (2020).                         | 0 |
| <b>PAN YX, 2020, AM J DENT</b>                                                 | Y.X. Pan, H.Y. Liu, C. Chu, X. Li, S.Y. Liu, S.L. Lu, Transmission routes of SARS-CoV-2 and protective measures in dental clinics during the COVID-19 pandemic, <i>American Journal of Dentistry</i> 33(3) (2020) 129-134.                         | 0 |
| <b>PAPI P, 2020, ORAL DIS</b>                                                  | P. Papi, B. Di Murro, D. Penna, G. Pompa, Digital prosthetic workflow during COVID-19 pandemic to limit infection risk in dental practice, <i>Oral Diseases</i> (2020).                                                                            | 0 |
| <b>PASSARELLI PC, 2020, EXP BIOL MED</b>                                       | P.C. Passarelli, E. Rella, P.F. Manicone, F. Garcia-Godoy, A. D'Addona, The impact of the COVID-19 infection in dentistry, <i>Experimental Biology and Medicine</i> 245(11) (2020) 940-944.                                                        | 0 |
| <b>PASTRIAN-SOTO GABRIEL, 2020, INTERNATIONAL JOURNAL OF ODONTOSTOMATOLOGY</b> | G. Pastrian-Soto, Bases Genéticas y Moleculares del COVID-19 (SARS-CoV-2). Mecanismos de Patogénesis y de Respuesta Inmune, <i>International journal of odontostomatology</i> 14(3) (2020) 331-337.                                                | 0 |

|                                                                       |                                                                                                                                                                                                                                                                              |   |
|-----------------------------------------------------------------------|------------------------------------------------------------------------------------------------------------------------------------------------------------------------------------------------------------------------------------------------------------------------------|---|
| <b>PATEL B, 2020, J<br/>ENDOD</b>                                     | B. Patel, M.A. Eskander, N.B. Ruparel, To Drill or Not to Drill: Management of Endodontic Emergencies and In-Process, Journal of endodontics (2020).                                                                                                                         | 0 |
| <b>PATEL T, 2020,<br/>BRIT DENT J</b>                                 | T. Patel, J. Wong, The role of real-time interactive video consultations in dental practice during the recovery and restoration phase of the COVID-19 outbreak, British Dental Journal 229(3) (2020) 196-200.                                                                | 0 |
| <b>PEDROSA MD, 2020,<br/>PESQUI BRAS<br/>ODONTOPE</b>                 | M.D. Pedrosa, C.R. Sipert, F.N. Nogueira, Salivary Glands, Saliva and Oral Findings in COVID-19 Infection, Pesquisa Brasileira Em Odontopediatria E Clinica Integrada 20 (2020).                                                                                             | 0 |
| <b>PELOSO RENAN<br/>MORAIS, 2020,<br/>BRAZILIAN ORAL<br/>RESEARCH</b> | R.M. Peloso, N.I.P. Pini, D. Sundfeld Neto, A.A. Mori, R.C.G.d. Oliveira, F.P. Valarelli, K.M.S. Freitas, How does the quarantine resulting from COVID-19 impact dental appointments and patient anxiety levels?, Brazilian Oral Research 34 (2020) e84.                     | 0 |
| <b>PEREIRA LUCIANO<br/>JOS, 2020,<br/>BRAZILIAN ORAL<br/>RESEARCH</b> | L.J. Pereira, C.V. Pereira, R.M. Murata, V. Pardi, S.M. Pereira-Dourado, Biological and social aspects of Coronavirus Disease 2019 (COVID-19) related to oral health, Brazilian Oral Research 34 (2020) e041.                                                                | 0 |
| <b>PERES KG, 2020,<br/>PESQUI BRAS<br/>ODONTOPE</b>                   | K.G. Peres, P. Reher, R.D. de Castro, A.R. Vieira, COVID-19-Related Challenges in Dental Education: Experiences From Brazil, the USA, and Australia, Pesquisa Brasileira Em Odontopediatria E Clinica Integrada 20 (2020).                                                   | 0 |
| <b>PERRILLAT A, 2020,<br/>J STOMATOL ORAL<br/>MAX SURG</b>            | A. Perrillat, J.M. Foletti, A.S. Lacagne, L. Guyot, N. Graillon, Facial pressure ulcers in COVID-19 patients undergoing prone positioning: How to prevent an underestimated epidemic?, Journal of Stomatology, Oral and Maxillofacial Surgery (2020).                        | 0 |
| <b>PINCHI V, 2020,<br/>DENT CADMOS</b>                                | V. Pinchi, E. Brambilla, F. Cairo, G.A. Norelli, I. Iavicoli, Responsibility in the time of the COVID-19 pandemic, Dental Cadmos 88(7) (2020) 448-461.                                                                                                                       | 0 |
| <b>PIOMBINO P, 2020, J<br/>CRANIOFAC SURG</b>                         | P. Piombino, L. Sani, U. Committeri, E. Carraturo, A. Foderini, A. Romano, G.D. Orabona, P. Bonavolont, V. Abbate, L. Califano, Guidelines and Recommendations for Patient Management, Surgical Activities, and, The Journal of craniofacial surgery 31(6) (2020) e630-e633. | 0 |

|                                                         |                                                                                                                                                                                                                                                                                                                                         |   |
|---------------------------------------------------------|-----------------------------------------------------------------------------------------------------------------------------------------------------------------------------------------------------------------------------------------------------------------------------------------------------------------------------------------|---|
| <b>POLITI I, 2020, BR J ORAL MAXILLOFAC SURG</b>        | I. Politi, E. McParland, R. Smith, S. Crummey, K. Fan, The impact of COVID-19 on cervicofacial infection of dental aetiology, <i>British Journal of Oral and Maxillofacial Surgery</i> 58(8) (2020) 1029-1033.                                                                                                                          | 0 |
| <b>PRADELLA F, 2020, J FORENSIC ODONTOSTOMATOLOGY</b>   | F. Pradella, I. Bianchi, G. Vitale, V. Pinchi, A contribution for the forensic odontologist's safety in the autopsy room, <i>Journal of forensic odonto-stomatology</i> 1(38) (2020) 48-50.                                                                                                                                             | 0 |
| <b>QU X, 2020, ZHONGHUA KOU QIANG YI XUE ZA ZHI</b>     | X. Qu, X.D. Zhou, Psychological intervention for patients with oral disease during the pandemic, <i>Zhonghua kou qiang yi xue za zhi = Zhonghua kouqiang yixue zazhi = Chinese journal</i> 55(4) (2020) 235-240.                                                                                                                        | 0 |
| <b>QUADRI MFA, 2020, J INFECT PUBLIC HEALTH</b>         | M.F.A. Quadri, M.A. Jafer, A.S. Alqahtani, S.A.B. Al Mutahar, N.I. Odabi, A.A. Daghriri, S.K. Tadakamadla, Novel corona virus disease (COVID-19) awareness among the dental interns, dental auxiliaries and dental specialists in Saudi Arabia: A nationwide study, <i>Journal of Infection and Public Health</i> 13(6) (2020) 856-864. | 0 |
| <b>QUINCHO-ROSALES DA, 2020, REV CUBA ESTOMATOLOGIA</b> | D.A. Quincho-Rosales, Y. Castro-Rodríguez, S. Grados-Pomarino, Considerations about dental care in peru during the COVID-19 pandemic, <i>Revista Cubana de Estomatologia</i> 57(3) (2020) 1-11.                                                                                                                                         | 0 |
| <b>QUINN B, 2020, EUR J DENT EDUC</b>                   | B. Quinn, J. Field, R. Gorter, I. Akota, M.C. Manzanares, C. Paganelli, J. Davies, J. Dixon, G. Gabor, R. Amaral Mendes, P. Hahn, S. Vital, J. O'Brien, D. Murphy, S. Tubert-Jeannin, COVID-19: The immediate response of european academic dental institutions and future, <i>European journal of dental education</i> (2020).         | 0 |
| <b>RADZINSKI FK, 2020, ODONTOESTOMATOLOGIA</b>          | F.K. Radzinski, COVID 19 and Oral and Maxillofacial Surgery, <i>Odontoestomatologia</i> 22 (2020).                                                                                                                                                                                                                                      | 0 |
| <b>RAHMAN N, 2020, BRIT DENT J</b>                      | N. Rahman, S. Nathwani, T. Kandiah, Teledentistry from a patient perspective during the coronavirus pandemic, <i>British Dental Journal</i> (2020).                                                                                                                                                                                     | 0 |

|                                                    |                                                                                                                                                                                                                                                                                                                                   |   |
|----------------------------------------------------|-----------------------------------------------------------------------------------------------------------------------------------------------------------------------------------------------------------------------------------------------------------------------------------------------------------------------------------|---|
| <b>RAMIREZ-MORA T, 2020, ODOVTOS INT J DENT S</b>  | T. Ramirez-Mora, C. Retana-Lobo, J. Reyes-Carmona, COVID-19: Perspectives on the Pandemic and its Incidence in Dentistry, <i>Odovtos International Journal of Dental Sciences</i> 22(3) (2020) 22-42.                                                                                                                             | 0 |
| <b>RAVENEL TD, 2020, QUINTESSENCE INT</b>          | T.D. Ravenel, R. Kessler, J.C. Comisi, A. Kelly, W.G. Renne, S.T. Teich, Evaluation of the spatter-reduction effectiveness and aerosol containment of eight dry-field isolation techniques, <i>Quintessence International</i> 51(8) (2020) 660-670.                                                                               | 0 |
| <b>REN Y, 2020, J DENT</b>                         | Y. Ren, C. Feng, L. Rasubala, H. Malmstrom, E. Eliav, Risk for dental healthcare professionals during the COVID-19 global pandemic: An evidence-based assessment, <i>Journal of Dentistry</i> . 101 (2020) 103434.                                                                                                                | 0 |
| <b>ROSING CK, 2020, PESQUI BRAS ODONTOPE</b>       | C.K. Rosing, J. Cavagni, G.P.J. Langa, T. Mazzetti, F. Muniz, Dental Care and the COVID-19 Pandemic: The Precautionary Principle and the Best Available Evidence, <i>Pesquisa Brasileira Em Odontopediatria E Clinica Integrada</i> 20 (2020).                                                                                    | 0 |
| <b>RUHIN B, 2020, J STOMATOL ORAL MAXI</b>         | B. Ruhin, Practitioners specialized in oral health and coronavirus disease 2019: Professional guidelines from the French society of stomatology, maxillofacial surgery and oral surgery, to form a common front against the infectious risk, <i>Journal of Stomatology, Oral and Maxillofacial Surgery</i> 121(2) (2020) 155-158. | 0 |
| <b>SA Y, 2020, J PROSTHET DENT</b>                 | Y. Sa, W.S. Lin, D. Morton, C. Huang, Coronavirus disease 2019 (COVID-19): Experiences and protocols from the Department of Prosthodontics at the Wuhan University, <i>Journal of Prosthetic Dentistry</i> (2020).                                                                                                                | 0 |
| <b>SACCOMANNO S, 2020, EUR J PAEDIATR DENT</b>     | S. Saccomanno, V. Quinzi, S. Sarhan, D. Lagana, G. Marzo, Perspectives of tele-orthodontics in the COVID-19 emergency and as a future tool in daily practice, <i>European Journal of Paediatric Dentistry</i> 21(2) (2020) 157-162.                                                                                               | 0 |
| <b>SALES PH, 2020, MINERVA STOMATOL</b>            | P.H. Sales, P.L. Sales, M.L. Da Hora Sales, COVID-2019. How to decrease the risk of infection in dental practice?, <i>Minerva stomatologica</i> (2020).                                                                                                                                                                           | 0 |
| <b>SAMARANAYAKE LP, 2020, ACTA ODONTOL SCAND</b>   | L.P. Samaranayake, K.S. Fakhruddin, H.C. Ngo, J.W.W. Chang, C. Panduwawala, The effectiveness and efficacy of respiratory protective equipment (RPE) in, <i>Acta odontologica Scandinavica</i> (2020) 1-14.                                                                                                                       | 0 |
| <b>SAMARANAYAKE LP, 2020, ACTA ODONTOL SCAND-a</b> | L.P. Samaranayake, K.S. Fakhruddin, C. Panduwawala, Sudden onset, acute loss of taste and smell in coronavirus disease 2019 (COVID-19): a systematic review, <i>Acta Odontologica Scandinavica</i> 78(6) (2020) 467-473.                                                                                                          | 0 |

|                                                                            |                                                                                                                                                                                                                                                                  |   |
|----------------------------------------------------------------------------|------------------------------------------------------------------------------------------------------------------------------------------------------------------------------------------------------------------------------------------------------------------|---|
| <b>SAMPSON V, 2020, BRIT DENT J</b>                                        | V. Sampson, N. Kamona, A. Sampson, Could there be a link between oral hygiene and the severity of SARS-CoV-2 infections?, British Dental Journal 228(12) (2020) 971-975.                                                                                         | 0 |
| <b>SANTOS-LPEZ MATAS, 2020, INTERNATIONAL JOURNAL OF ODONTOSTOMATOLOGY</b> | M. Santos-López, H. Catrian-Fernández, COVID-19 y el Nuevo Rol del Odontólogo en el Equipo de Salud, International journal of odontostomatology 14(3) (2020) 296-298.                                                                                            | 0 |
| <b>SCHOENBRUNNER A, 2020, J CRANIOFAC SURG</b>                             | A. Schoenbrunner, B. Sarac, A. Gosman, J.E. Janis, Considerations for Pediatric Craniofacial Surgeons During the COVID-19 Outbreak, The Journal of craniofacial surgery 31(6) (2020) e618-e620.                                                                  | 0 |
| <b>SCHWENDICKE F, 2020, J DENT</b>                                         | F. Schwendicke, J. Krois, J. Gomez, Impact of SARS-CoV2 (Covid-19) on dental practices: Economic analysis, Journal of Dentistry 99 (2020).                                                                                                                       | 0 |
| <b>SEZGIN GZIDE PELIN, 2020, BRAZILIAN ORAL RESEARCH</b>                   | G.P. Sezgin, B. Şirinoğlu Çapan, Assessment of dentists awareness and knowledge levels on the Novel Coronavirus (COVID-19), Brazilian Oral Research 34 (2020) e112.                                                                                              | 0 |
| <b>SHAH A, 2020, BRIT DENT J</b>                                           | A. Shah, C. Bryant, J. Patel, H. Tagar, D. Akintola, O. Obisesan, COVID-19: establishing an oral surgery-led urgent dental care hub, British Dental Journal 228(12) (2020) 957-963.                                                                              | 0 |
| <b>SILVA PGB, 2020, EUR J DENT EDUC</b>                                    | P.G.B. Silva, C.A.L. de Oliveira, M.M.F. Borges, D.M. Moreira, P.N.B. Alencar, R.L. Avelar, R.M.R. Bitu Sousa, F. Bitu Sousa, Distance learning during social seclusion by COVID-19: improving the quality of life, European journal of dental education (2020). | 0 |
| <b>SOMMER MU, 2020, ORAL DIS</b>                                           | M.U. Sommer, T. Davidovitch, O. Platner, A. Inerman, N. Yarom, The effect of COVID-19 pandemic on oral medicine services in a tertiary referral center, Oral Diseases (2020).                                                                                    | 0 |
| <b>SOUZA CARLOS DORNELS FREIRE DE, 2020,</b>                               | C.D.F.d. Souza, V.T.d. Gois-Santos, D.S. Correia, P.R. Martins-Filho, V.S. Santos, The need to strengthen Primary Health Care in Brazil in the context of the COVID-19 pandemic, Brazilian Oral Research 34 (2020) e047.                                         | 0 |

**BRAZILIAN ORAL  
RESEARCH**

|                                                              |                                                                                                                                                                                                                                                                                            |   |
|--------------------------------------------------------------|--------------------------------------------------------------------------------------------------------------------------------------------------------------------------------------------------------------------------------------------------------------------------------------------|---|
| <b>SOUZA VGC, 2020,<br/>PESQUI BRAS<br/>ODONTOPE</b>         | V.G.C. Souza, D.F. Lopes, F.C. Machado, R.L. Fabri, A.C.M. Apolonio, The Novel Coronavirus: An Alert for Pacifiers' Disinfection, <i>Pesquisa Brasileira Em Odontopediatria E Clinica Integrada</i> 20 (2020).                                                                             | 0 |
| <b>SPANEMBERG JC,<br/>2020, J DENT EDUC</b>                  | J.C. Spanemberg, C.C. Simoes, J.A. Cardoso, The impacts of the COVID-19 pandemic on the teaching of dentistry in Brazil, <i>Journal of Dental Education</i> (2020).                                                                                                                        | 0 |
| <b>SPICCIARELLI V,<br/>2020, J<br/>OSSEOINTEGRATI<br/>ON</b> | V. Spicciarelli, C. Marruganti, M. Viviano, N. Baldini, G. Franciosi, M. Tortoriello, S. Grandini, Prevention and safety in the dental office after Novel Human Coronavirus outbreak: unresolved questions and future directions, <i>Journal of Osseointegration</i> 12(2) (2020) 145-153. | 0 |
| <b>SUN JIN, 2020,<br/>BRAZILIAN ORAL<br/>RESEARCH</b>        | J. Sun, Y. Xu, Q. Qu, W. Luo, Knowledge of and attitudes toward COVID-19 among parents of child dental patients during the outbreak, <i>Brazilian Oral Research</i> 34 (2020) e066.                                                                                                        | 0 |
| <b>SUNAVALA-DOSSA<br/>BHOY G, 2020,<br/>ORAL DIS</b>         | G. Sunavala-Dossabhoj, A.I. Spielman, Restructuring of dental education in a post-COVID-19 era, <i>Oral Diseases</i> (2020).                                                                                                                                                               | 0 |
| <b>TADA H, 2020,<br/>ORAL DIS</b>                            | H. Tada, W.H. Shao, N. Ishimaru, Y. Kudo, The life in Japan and status of private dental office at the times of COVID-19, <i>Oral Diseases</i> (2020).                                                                                                                                     | 0 |
| <b>TAKEUCHI Y, 2020,<br/>J ORAL SCI</b>                      | Y. Takeuchi, M. Furuchi, A. Kamimoto, K. Honda, H. Matsumura, R. Kobayashi, Saliva-based PCR tests for SARS-CoV-2 detection, <i>Journal of Oral Science</i> 62(3) (2020) 350-351.                                                                                                          | 0 |
| <b>TALLA PK, 2020,<br/>QUINTESSENCE<br/>INT</b>              | P.K. Talla, L. Levin, M. Glogauer, C. Cable, P.J. Allison, Delivering dental care as we emerge from the initial phase of the COVID-19 pandemic: teledentistry and face-to-face consultations in a new clinical world, <i>Quintessence International</i> 51(8) (2020) 672-677.              | 0 |
| <b>TANG GY, 2020,<br/>SHANGHAI KOU<br/>QIANG YI XUE</b>      | G.Y. Tang, Experts recommendation on the diagnosis and treatment of oral mucosal diseases, <i>Shanghai kou qiang yi xue</i> = <i>Shanghai journal of stomatology</i> 29(2) (2020) 118-122.                                                                                                 | 0 |

|                                                        |                                                                                                                                                                                                                                                     |   |
|--------------------------------------------------------|-----------------------------------------------------------------------------------------------------------------------------------------------------------------------------------------------------------------------------------------------------|---|
| <b>TANG HS, 2020, ZHONGHUA KOU QIANG YI XUE ZA ZHI</b> | H.S. Tang, Z.Q. Yao, W.M. Wang, Emergency management of prevention and control of the novel coronavirus infection, Zhonghua kou qiang yi xue za zhi = Zhonghua kouqiang yixue zazhi = Chinese journal 55(4) (2020) 246-248.                         | 0 |
| <b>TAO ZY, 2020, J MED INTERNET RES</b>                | Z.Y. Tao, G. Chu, C. McGrath, F. Hua, Y.Y. Leung, W.F. Yang, Y.X. Su, Nature and Diffusion of COVID-19-related Oral Health Information on Chinese Social Media: Analysis of Tweets on Weibo, Journal of Medical Internet Research 22(6) (2020).     | 0 |
| <b>TARIQ R, 2020, J ORAL RES</b>                       | R. Tariq, H. Hamid, S. Mashood, Y. Tariq, S. Tariq, F.Y.I. Asiri, Z. Khurshid, Common misconceptions regarding COVID-19 among health care professionals: An online global cross-sectional survey, Journal of Oral Research 2020(SI 2) (2020) 33-42. | 0 |
| <b>TEICHERT R, 2020, INT ENDOD J</b>                   | R. Teichert, C.N. Baldasso, M.M. Campos, M.S. Gomes, Protective device to reduce aerosol dispersion in dental clinics during the COVID-19 pandemic, International Endodontic Journal (2020).                                                        | 0 |
| <b>TEJA KV, 2020, BRAZ DENT SCI</b>                    | K.V. Teja, K.A. Vasundhara, G. Sriram, Knowledge, awareness, and practice of dentists in preventing-novel corona virus (COVID-19) transmission-a questionnaire based cross-sectional survey, Brazilian Dental Science 23(2) (2020) 1-9.             | 0 |
| <b>THOMAS DC, 2020, J AM DENT ASSOC</b>                | D.C. Thomas, S.M. Baddireddy, D. Kohli, Anosmia: A review in the context of coronavirus disease 2019 and orofacial pain, Journal of the American Dental Association (1939) 151(9) (2020) 696-702.                                                   | 0 |
| <b>TOM J, 2020, ANESTH PROG</b>                        | J. Tom, Infection Control in Dental Anesthesiology: A Time for Preliminary Reconsideration, Anesthesia progress 67(2) (2020) 109-120.                                                                                                               | 0 |
| <b>TURKISTANI KA, 2020, AM J ORTHOD DENTOFAC</b>       | K.A. Turkistani, Precautions and recommendations for orthodontic settings during the COVID-19 outbreak: A review, American Journal of Orthodontics and Dentofacial Orthopedics 158(2) (2020) 175-181.                                               | 0 |
| <b>TYSIAC-MISTA M, 2020, INT J ENV RES PUB HE</b>      | M. Tysiac-Mista, A. Dziedzic, The Attitudes and Professional Approaches of Dental Practitioners during the COVID-19 Outbreak in Poland: A Cross-Sectional Survey, International Journal of Environmental Research and Public Health 17(13) (2020).  | 0 |
| <b>UMER F, 2020, SPEC CARE DENT</b>                    | F. Umer, M. Motiwala, Dental services during the COVID-19 pandemic: A tertiary care hospital experience, Special Care in Dentistry (2020).                                                                                                          | 0 |

|                                                                |                                                                                                                                                                                                                                                  |   |
|----------------------------------------------------------------|--------------------------------------------------------------------------------------------------------------------------------------------------------------------------------------------------------------------------------------------------|---|
| <b>VARGAS-BURATOV IC JP, 2020, MEDWAVE</b>                     | J.P. Vargas-Buratovic, F. Verdugo-Paiva, C. Veliz-Paiva, E. Lopez-Tagle, A. Ahumada-Salinas, D. Ortuno-Borroto, Dental recommendations in the COVID-19 pandemic: A narrative review, <i>Medwave</i> 20(5) (2020).                                | 0 |
| <b>VERDERA S, 2020, ODONTOESTOMATOLOGIA</b>                    | S. Verdera, Restorative Dentistry protocol for the health emergency COVID-19, <i>Odontoestomatologia</i> 22 (2020).                                                                                                                              | 0 |
| <b>VERGARA-BUENAVENTURA A, 2020, BR J ORAL MAXILLOFAC SURG</b> | A. Vergara-Buenaventura, C. Castro-Ruiz, Use of mouthwashes against COVID-19 in dentistry, <i>British Journal of Oral and Maxillofacial Surgery</i> 58(8) (2020) 924-927.                                                                        | 0 |
| <b>VILLANI FA, 2020, INT J ENV RES PUBL HE</b>                 | F.A. Villani, R. Aiuto, L. Paglia, D. Re, COVID-19 and Dentistry: Prevention in Dental Practice, a Literature Review, <i>International Journal of Environmental Research and Public Health</i> 17(12) (2020).                                    | 0 |
| <b>VOLGENANT CMC, 2020, ORAL DIS</b>                           | C.M.C. Volgenant, I.F. Persoon, R.A.G. de Ruijter, J.J.H. de Soet, [Infection prevention in dental care during the outbreak of SARS-CoV-2], <i>Nederlands tijdschrift voor tandheelkunde</i> 127(5) (2020) 309-317.                              | 0 |
| <b>VRBANOVI E, 2020, ORAL DIS</b>                              | E. Vrbanovic, I.Z. Alajbeg, I. Alajbeg, COVID-19 pandemic and Zagreb earthquakes as stressors in patients with temporomandibular disorders, <i>Oral Diseases</i> (2020).                                                                         | 0 |
| <b>WARABI Y, 2020, SPEC CARE DENT</b>                          | Y. Warabi, S. Tobisawa, T. Kawazoe, A. Murayama, R. Norioka, R. Morishima, T. Inoue, T. Shimizu, K. Takahashi, Effects of oral care on prolonged viral shedding in coronavirus disease 2019 (COVID-19), <i>Special Care in Dentistry</i> (2020). | 0 |
| <b>WARNAKULASURI YA S, 2020, ORAL DIS</b>                      | S. Warnakulasuriya, Protecting dental manpower from COVID-19 infection, <i>Oral Diseases</i> (2020).                                                                                                                                             | 0 |
| <b>WU KY, 2020, ORAL DIS</b>                                   | K.Y. Wu, D.T. Wu, T.T. Nguyen, S.D. Tran, COVID-19's impact on private practice and academic dentistry in North America, <i>Oral Diseases</i> (2020).                                                                                            | 0 |



|                                                        |                                                                                                                                                                                                                                                                                                       |   |
|--------------------------------------------------------|-------------------------------------------------------------------------------------------------------------------------------------------------------------------------------------------------------------------------------------------------------------------------------------------------------|---|
| <b>XIONG X, 2020, AM J ORTHOD DENTOFACIAL ORTHOP</b>   | X. Xiong, Y. Wu, X. Fang, W. Sun, Q. Ding, Y. Yi, Y. Huang, J. Gong, J. Liu, J. Wang, Mental distress in orthodontic patients during the coronavirus disease 2019 pandemic, American Journal of Orthodontics and Dentofacial Orthopedics (2020).                                                      | 0 |
| <b>YANG YJ, 2020, SHANGHAI KOU QIANG YI XUE</b>        | Y.J. Yang, J.J. Zhao, Y.Q. Zhu, [The risk and prevention of bio-aerosol transmission in dental clinics], Shanghai kou qiang yi xue = Shanghai journal of stomatology 29(2) (2020) 127-132.                                                                                                            | 0 |
| <b>YANG YT, 2020, DENT TRAUMATOL</b>                   | Y.T. Yang, W. Zhang, L. Xie, Z.B. Li, Z. Li, Characteristic changes of traumatic dental injuries in a teaching hospital of Wuhan, Dental traumatology : official publication of International Association for Dental (2020).                                                                          | 0 |
| <b>YU C, 2020, J DENT RES</b>                          | C. Yu, L. Li, Y. Tuersun, X. Zhao, Q. Feng, T. Zhang, F.R. Tay, J. Ma, Oropharyngeal Secretion as Alternative for SARS-CoV-2 Detection, Journal of Dental Research 99(10) (2020) 1199-1205.                                                                                                           | 0 |
| <b>YU J, 2020, J ENDOD</b>                             | J. Yu, F. Hua, Y. Shen, M. Haapasalo, D. Qin, D. Zhao, B. Peng, A. Fouad, Resuming of endodontic practices in COVID-19 hardest-hit area of China: A Web-based, Journal of endodontics (2020).                                                                                                         | 0 |
| <b>YU J, 2020, ORAL DIS</b>                            | J. Yu, F. Hua, D. Qin, D. Zhao, Z. Li, Impact of citywide COVID-19 testing on people's behaviour in seeking for dental, Oral diseases (2020).                                                                                                                                                         | 0 |
| <b>YUE L, 2020, CHIN J DENT RES</b>                    | L. Yue, Ventilation in the Dental Clinic: An Effective Measure to Control Droplets and, Chinese journal of dental research 23(2) (2020) 105-107.                                                                                                                                                      | 0 |
| <b>ZAID W, 2020, J ORAL MAXILLOFAC SURG</b>            | W. Zaid, T. Schlieve, The Early Effects of Coronavirus Disease-2019 on Head and Neck Oncology and Microvascular Reconstruction Practice: A National Survey of Oral and Maxillofacial Surgeons Enrolled in the Head and Neck Special Interest Group, Journal of Oral and Maxillofacial Surgery (2020). | 0 |
| <b>ZEMOURI C, 2020, J DENT RES</b>                     | C. Zemouri, S.F. Awad, C.M.C. Volgenant, W. Crielaard, A. Laheij, J.J. de Soet, Modeling of the Transmission of Coronaviruses, Measles Virus, Influenza Virus, Mycobacterium tuberculosis, and Legionella pneumophila in Dental Clinics, Journal of Dental Research 99(10) (2020) 1192-1198.          | 0 |
| <b>ZENG XJ, 2020, ZHONGHUA KOU QIANG YI XUE ZA ZHI</b> | X.J. Zeng, X.D. Zhou, W.X. Chen, [Development and improvement of Chinese oral public health system], Zhonghua kou qiang yi xue za zhi = Zhonghua kouqiang yixue zazhi = Chinese journal 55(6) (2020) 361-366.                                                                                         | 0 |

**ZHANG XH, 2020,** X.H. Zhang, J.Q. Ling, Guidelines on the Prevention and Control of Disease in Dental Practice during the, Chinese  
**CHIN J DENT RES** journal of dental research 23(2) (2020) 89-94.

0

---

TC - the total number of citations per article
