# Supplementary material
Source: PubMed Central journal article supplement (PMC8022306)
Supplement: 784_2021_3916_MOESM4_ESM.pdf [file 784_2021_3916_MOESM4_ESM.pdf]

Online Resource 4. The most contributing authors according to their total frequency (TA), adjusted frequency (AF) and Dominance Factor (DF)

| Rank by TA | Authors           | TA | AF   | DF   | SA | MA | FA | LoE I | LoE IV | LoE V | LoE VI | LoE VII | LoE 0 | Other |
|------------|-------------------|----|------|------|----|----|----|-------|--------|-------|--------|---------|-------|-------|
| 1          | BRENNAN PA        | 6  | 1.81 | 0    | 0  | 6  | 0  |       |        | 1     |        | 5       |       |       |
| 2          | SAMARANAYAKE LP   | 6  | 1.49 | 0.33 | 0  | 6  | 2  | 1     |        | 1     |        | 3       |       | 1     |
| 2          | ZHOU XD           | 5  | 1.28 | 0    | 0  | 5  | 0  |       |        |       |        | 5       |       |       |
| 4          | DZIEDZIC A        | 4  | 2.5  | 0.67 | 1  | 3  | 2  |       |        | 1     |        | 1       |       | 2     |
| 4          | HUA F             | 4  | 0.80 | 0    | 0  | 4  | 0  |       |        | 2     |        | 1       |       | 1     |
| Rank by AF | Authors           | TA | AF   | DF   | SA | MA | FA | LoE I | LoE IV | LoE V | LoE VI | LoE VII | LoE 0 | Other |
| 1          | DZIEDZIC A        | 4  | 2.5  | 0.67 | 1  | 3  | 2  |       |        | 1     |        | 1       |       | 2     |
| 2          | BAGHIZADEH FINI M | 2  | 2    | NA   | 2  | 0  | NA |       |        |       |        | 2       |       |       |
| 2          | HARIKRISHNAN P    | 2  | 2    | NA   | 2  | 0  | NA |       |        |       |        | 2       |       |       |
| 4          | BRENNAN PA        | 6  | 1.81 | 0    | 0  | 6  | 0  |       |        | 1     |        | 5       |       |       |
| 5          | SAMARANAYAKE LP   | 5  | 1.49 | 0.33 | 0  | 6  | 2  | 1     |        | 1     |        | 3       |       | 1     |
| Rank by DF | Authors           | TA | AF   | DF   | SA | MA | FA | LoE I | LoE IV | LoE V | LoE VI | LoE VII | LoE 0 | Other |
| 1          | YU JJ             | 3  | 0.53 | 1    | 0  | 3  | 3  |       |        | 2     |        |         |       | 1     |
| 1          | AZZI L            | 2  | 0.24 | 1    | 0  | 2  | 2  |       |        | 1     |        |         |       | 1     |
| 1          | BIDRA AS          | 2  | 0.33 | 1    | 0  | 2  | 2  |       |        |       |        |         | 2     |       |
| 1          | COTRIN P          | 2  | 0.29 | 1    | 0  | 2  | 2  |       |        | 2     |        |         |       |       |
| 5          | DZIEDZIC A        | 4  | 2.5  | 0.67 | 1  | 3  | 2  |       |        | 1     |        | 1       |       | 2     |

TA - the total number of articles; AF - adjusted frequency that reflects multiple-authored articles; DF - Dominance Factor; SA - the total number of single-authored articles; MA - the total number of multi-authored articles of an author; FA - the number of multi-authored publications of an author as the first author; LoE - Level of Evidence; LoE I - Systematic review or meta-analysis of randomised controlled clinical trials; LoE II - Randomised controlled clinical trial; LoE III - Controlled clinical trial; LoE IV - Cohort study, case control study, systematic review or meta-analysis of cohort or case control studies; LoE V - Cross-sectional study, case series study, systematic review or meta-analysis of cross-sectional studies, case series or case reports; LoE VI - Case report; LoE VII - Narrative literature review, panel and expert opinion, systematic review or meta-analysis of narrative reviews, editorials, guidelines, comments, perspectives; LoE 0 - Animal research, in vitro / lab studies, systematic review or meta-analysis of animal, in vitro / lab studies; Other - Scientific report/pilot study, simulation study or short communication; NA - not applicable
