# Supplementary material
Source: PubMed Central journal article supplement (PMC8022306)
Supplement: 784_2021_3916_MOESM8_ESM.pdf [file 784_2021_3916_MOESM8_ESM.pdf]

Online Resource 8. Contributing countries ranked by the total number of articles

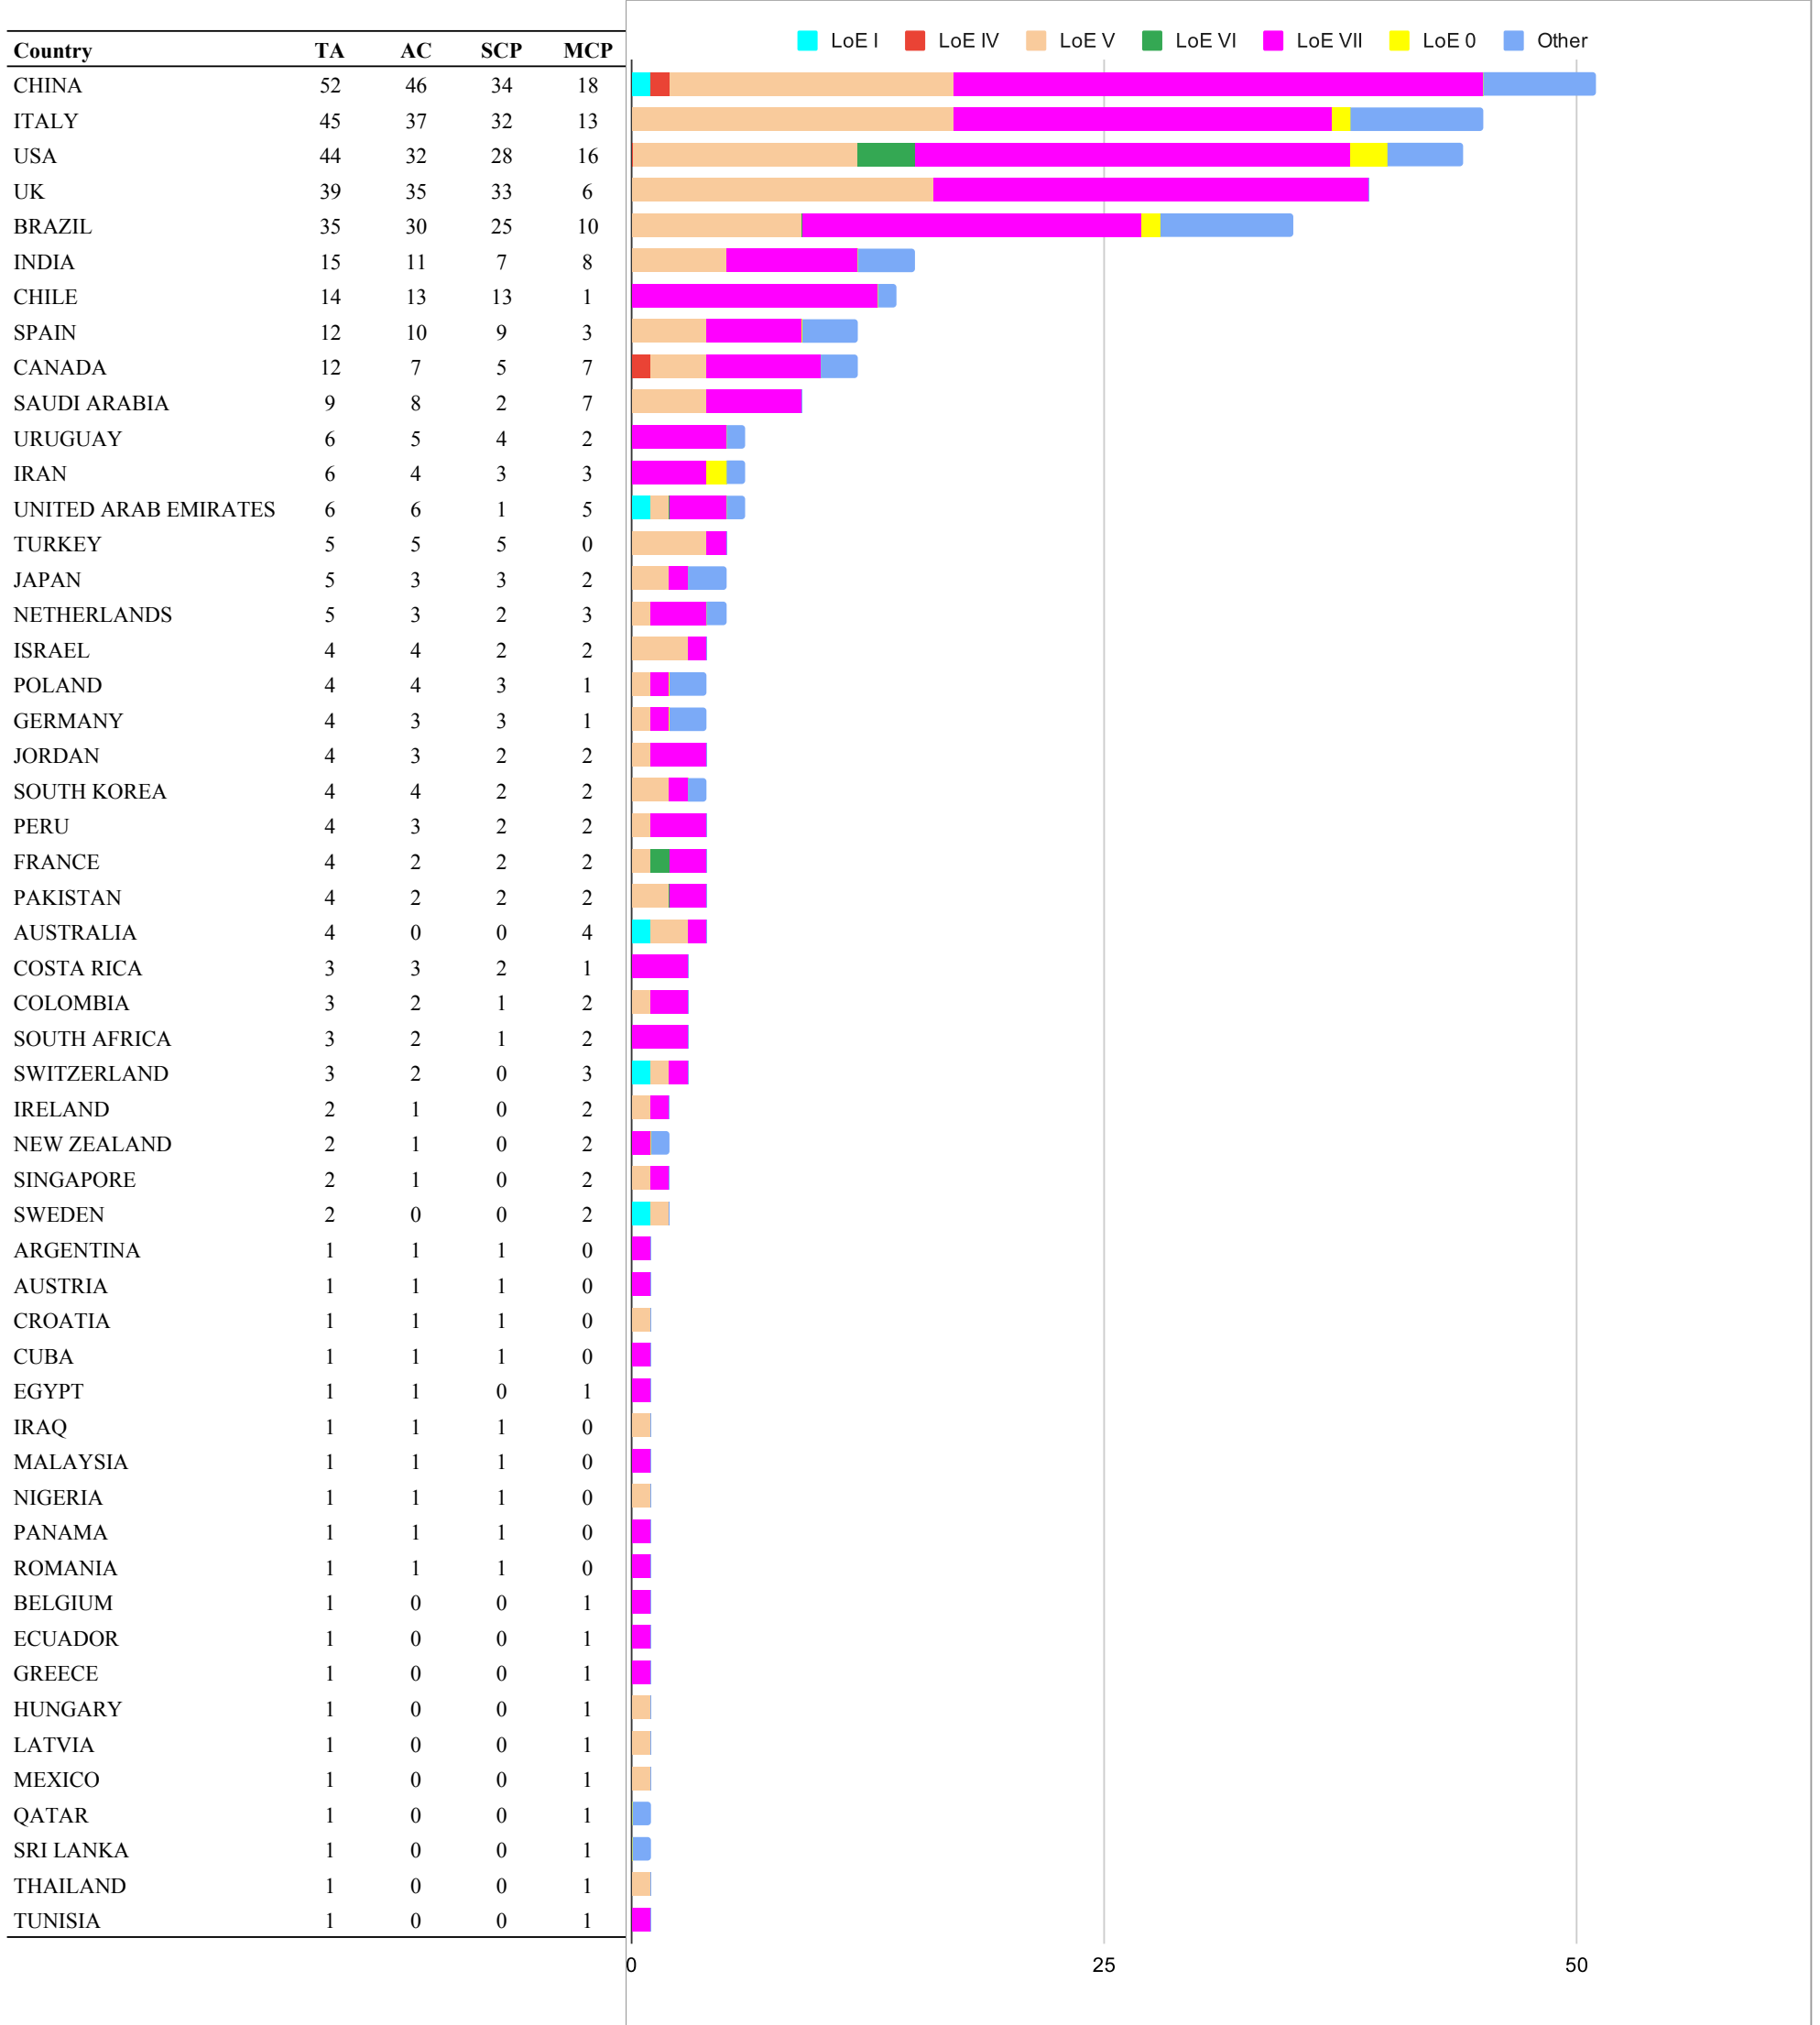

TA - the total number of articles; AC - the total number of articles based on the corresponding author's country of origin; SCP - the total number of single-country articles; MCP - the total number of multi-country articles; LoE - Level of Evidence; LoE I - Systematic review or meta-analysis of randomised controlled clinical trials; LoE II - Randomised controlled clinical trial; LoE III - Controlled clinical trial; LoE IV - Cohort study, case control study, systematic review or meta-analysis of cohort or case control studies; LoE V - Cross-sectional study, case series study, systematic review or meta-analysis of cross-sectional studies, case series or case reports; LoE VI - Case report; LoE VII - Narrative literature review, panel and expert opinion, systematic review or meta-analysis of narrative reviews, editorials, guidelines, comments, perspectives; LoE 0 - Animal research, in vitro / lab studies, systematic review or meta-analysis of animal, in vitro / lab studies; Other - Scientific report/pilot study, simulation study or short communication
