# Supplementary material
Source: PubMed Central journal article supplement (PMC8022306)
Supplement: 784_2021_3916_MOESM10_ESM.pdf [file 784_2021_3916_MOESM10_ESM.pdf]

## Online Resource 10. Journals

| Sources                                                                     | JCR®<br>IF2019 | QC                               | TA | TC* | mTC <sub>A</sub> |
|-----------------------------------------------------------------------------|----------------|----------------------------------|----|-----|------------------|
| ORAL DISEASES                                                               | 2.613          | Q1 <sup>1</sup>                  | 24 | 56  | 2.33             |
| BRITISH JOURNAL OF ORAL AND MAXILLOFACIAL SURGERY                           | 1.061          | Q4 <sup>1,2</sup>                | 22 | 10  | 0.45             |
| INTERNATIONAL JOURNAL OF ENVIRONMENTAL RESEARCH AND PUBLIC HEALTH           | 2.849          | Q1 <sup>3</sup> /Q2 <sup>4</sup> | 16 | 47  | 2.94             |
| BRITISH DENTAL JOURNAL                                                      | 1.306          | Q4 <sup>1</sup>                  | 14 | 0   | 0                |
| INTERNATIONAL JOURNAL OF ODONTOSTOMATOLOGY                                  | -              | NA <sup>#</sup>                  | 13 | 11  | 0.85             |
| BRAZILIAN ORAL RESEARCH                                                     | 1.633          | Q3 <sup>1</sup>                  | 11 | 0   | 0                |
| PESQUISA BRASILEIRA EM ODONTOLOGIA E CLINICA INTEGRADA                      | -              | NA <sup>S</sup>                  | 11 | 0   | 0                |
| JOURNAL OF CRANIOFACIAL SURGERY                                             | 0.953          | Q4 <sup>2</sup>                  | 7  | 0   | 0                |
| JOURNAL OF DENTAL RESEARCH                                                  | 4.914          | Q1 <sup>1</sup>                  | 7  | 165 | 23.57            |
| JOURNAL OF ORAL AND MAXILLOFACIAL SURGERY                                   | 2.068          | Q3 <sup>1</sup>                  | 6  | 4   | 0.67             |
| ORAL ONCOLOGY                                                               | 3.979          | Q1 <sup>1</sup> /Q2 <sup>5</sup> | 6  | 31  | 5.17             |
| AMERICAN JOURNAL OF ORTHODONTICS AND DENTOFACIAL ORTHOPEDICS                | 1.960          | Q2 <sup>1</sup>                  | 5  | 0   | 0                |
| BRAZILIAN DENTAL SCIENCE                                                    | -              | NA <sup>S</sup>                  | 5  | 0   | 0                |
| CHINESE JOURNAL OF DENTAL RESEARCH                                          | -              | NA <sup>S,#</sup>                | 5  | 5   | 1                |
| CLINICAL ORAL INVESTIGATIONS                                                | 2.812          | Q1 <sup>1</sup>                  | 5  | 13  | 2.6              |
| DENTAL CADMOS                                                               | -              | NA <sup>S</sup>                  | 5  | 1   | 0.2              |
| HEAD AND NECK-JOURNAL FOR THE SCIENCES AND SPECIALTIES OF THE HEAD AND NECK | 2.538          | Q1 <sup>6</sup> /Q2 <sup>2</sup> | 5  | 10  | 2                |
| JOURNAL OF DENTAL SCIENCES                                                  | 1.034          | Q4 <sup>1</sup>                  | 5  | 0   | 0                |
| ODONTOESTOMATOLOGIA                                                         | -              | NA                               | 5  | 0   | 0                |
| EUROPEAN JOURNAL OF DENTAL EDUCATION                                        | 1.050          | Q3 <sup>7</sup> /Q4 <sup>1</sup> | 4  | 0   | 0                |
| INTERNATIONAL JOURNAL OF DENTISTRY                                          | -              | NA <sup>S</sup>                  | 4  | 2   | 0.5              |
| JOURNAL OF ENDODONTICS                                                      | 3.118          | Q1 <sup>1</sup>                  | 4  | 51  | 12.75            |
| ODOVTOS INTERNATIONAL JOURNAL OF DENTAL SCIENCES                            | -              | NA <sup>S</sup>                  | 4  | 1   | 0.25             |
| SHANGHAI KOU QIANG YI XUE = SHANGHAI JOURNAL OF STOMATOLOGY                 | -              | NA <sup>#</sup>                  | 4  | 0   | 0                |
| SPECIAL CARE IN DENTISTRY                                                   | -              | NA <sup>S,#</sup>                | 4  | 2   | 0.5              |

|                                                                                                         |       |                    |   |     |        |
|---------------------------------------------------------------------------------------------------------|-------|--------------------|---|-----|--------|
| ZHONGHUA KOU QIANG YI XUE ZA ZHI =<br>ZHONGHUA KOUQIANG YIXUE ZAZHI = CHINESE<br>JOURNAL OF STOMATOLOGY | -     | NA <sup>#</sup>    | 4 | 0   | 0      |
| ACTA ODONTOLOGICA SCANDINAVICA                                                                          | 1.573 | Q3 <sup>1</sup>    | 3 | 0   | 0      |
| INTERNATIONAL JOURNAL OF ORAL SCIENCE                                                                   | 3.047 | Q1 <sup>1</sup>    | 3 | 454 | 151.33 |
| JOURNAL OF DENTAL EDUCATION                                                                             | 1.322 | Q4 <sup>1</sup>    | 3 | 11  | 3.67   |
| JOURNAL OF ORAL SCIENCE                                                                                 | 1.200 | Q4 <sup>1, 8</sup> | 3 | 1   | 0.33   |
| QUINTESSENCE INTERNATIONAL                                                                              | 1.460 | Q3 <sup>1</sup>    | 3 | 6   | 2      |
| REVISTA CUBANA DE ESTOMATOLOGIA                                                                         | -     | NA                 | 3 | 0   | 0      |
| AMERICAN JOURNAL OF DENTISTRY                                                                           | 0.957 | Q4 <sup>1</sup>    | 2 | 1   | 0.5    |
| ANESTHESIA PROGRESS                                                                                     | -     | NA <sup>#</sup>    | 2 | 0   | 0      |
| DENTISTRY JOURNAL                                                                                       | -     | NA                 | 2 | 0   | 0      |
| INTERNATIONAL DENTAL JOURNAL                                                                            | 2.038 | Q2 <sup>1</sup>    | 2 | 1   | 0.5    |
| INTERNATIONAL ENDODONTIC JOURNAL                                                                        | 3.801 | Q1 <sup>1</sup>    | 2 | 6   | 3      |
| JDR CLINICAL & TRANSLATIONAL RESEARCH                                                                   | -     | NA <sup>S,#</sup>  | 2 | 6   | 2      |
| JOURNAL OF CONTEMPORARY DENTAL PRACTICE                                                                 | -     | NA <sup>#</sup>    | 2 | 0   | 0      |
| JOURNAL OF DENTISTRY                                                                                    | 3.242 | Q1 <sup>1</sup>    | 2 | 0   | 0      |
| JOURNAL OF ORAL BIOLOGY AND CRANIOFACIAL<br>RESEARCH                                                    | -     | NA                 | 2 | 0   | 0      |
| JOURNAL OF PROSTHODONTICS-IMPLANT ESTHETIC<br>AND RECONSTRUCTIVE DENTISTRY                              | 2.187 | Q2 <sup>1</sup>    | 2 | 3   | 1.5    |
| JOURNAL OF STOMATOLOGY, ORAL AND<br>MAXILLOFACIAL SURGERY                                               | 1.152 | Q4 <sup>1</sup>    | 2 | 0   | 0      |
| MAXILLOFACIAL PLASTIC AND RECONSTRUCTIVE<br>SURGERY                                                     | -     | NA <sup>S</sup>    | 2 | 9   | 4.5    |
| ORAL RADIOLOGY                                                                                          | 0.540 | Q4 <sup>1</sup>    | 2 | 0   | 0      |
| ORAL SURGERY, ORAL MEDICINE, ORAL<br>PATHOLOGY AND ORAL RADIOLOGY                                       | 1.601 | Q3 <sup>1</sup>    | 2 | 0   | 0      |
| REVISTA ESPAÑOLA DE CIRUGA ORAL Y<br>MAXILOFACIAL                                                       | -     | NA                 | 2 | 0   | 0      |
| RGO - REVISTA GACHA DE ODONTOLOGIA                                                                      | -     | NA                 | 2 | 0   | 0      |
| ANGLE ORTHODONTIST                                                                                      | 1.549 | Q3 <sup>1</sup>    | 1 | 4   | 4      |
| APOS TRENDS IN ORTHODONTICS                                                                             | -     | NA <sup>S</sup>    | 1 | 0   | 0      |
| BMC ORAL HEALTH                                                                                         | 1.911 | Q2 <sup>1</sup>    | 1 | 1   | 1      |
| DENTAL AND MEDICAL PROBLEMS                                                                             | -     | NA <sup>S,#</sup>  | 1 | 4   | 4      |
| DENTAL TRAUMATOLOGY                                                                                     | 1.530 | Q3 <sup>1</sup>    | 1 | 0   | 0      |

|                                                                                                       |        |                                   |   |     |     |
|-------------------------------------------------------------------------------------------------------|--------|-----------------------------------|---|-----|-----|
| EUROPEAN ARCHIVES OF PAEDIATRIC DENTISTRY                                                             | -      | NA <sup>S,#</sup>                 | 1 | 1   | 1   |
| EUROPEAN JOURNAL OF PAEDIATRIC DENTISTRY                                                              | 1.500  | Q3 <sup>1,9</sup>                 | 1 | 1   | 1   |
| EXPERIMENTAL BIOLOGY AND MEDICINE                                                                     | 3.139  | Q3 <sup>10</sup>                  | 1 | 1   | 1   |
| GIORNALE ITALIANO DI ENDODONZIA                                                                       | -      | NA <sup>S</sup>                   | 1 | 0   | 0   |
| HUA XI KOU QIANG YI XUE ZA ZHI = HUAXI<br>KOUQIANG YIXUE ZAZHI = WEST CHINA JOURNAL<br>OF STOMATOLOGY | -      | NA <sup>#</sup>                   | 1 | 0   | 0   |
| INTERNATIONAL JOURNAL OF MEDICAL<br>DENTISTRY                                                         | -      | NA <sup>S</sup>                   | 1 | 0   | 0   |
| INTERNATIONAL JOURNAL OF ORAL AND<br>MAXILLOFACIAL SURGERY                                            | 2.068  | Q2 <sup>1,2</sup>                 | 1 | 2   | 2   |
| JMIR PUBLIC HEALTH AND SURVEILLANCE                                                                   | -      | NA <sup>#,**</sup>                | 1 | 13  | 13  |
| JOURNAL OF CRANIO-MAXILLOFACIAL SURGERY                                                               | 1.766  | Q3 <sup>1,2</sup>                 | 1 | 11  | 11  |
| JOURNAL OF FORENSIC ODONTO-STOMATOLOGY                                                                | -      | NA <sup>#</sup>                   | 1 | 0   | 0   |
| JOURNAL OF INFECTION                                                                                  | 4.842  | Q1 <sup>11</sup>                  | 1 | 26  | 26  |
| JOURNAL OF INFECTION AND PUBLIC HEALTH                                                                | 2.447  | Q2 <sup>3</sup> /Q3 <sup>11</sup> | 1 | 0   | 0   |
| JOURNAL OF KOREAN MEDICAL SCIENCE                                                                     | 1.705  | Q2 <sup>12</sup>                  | 1 | 4   | 4   |
| JOURNAL OF MAXILLOFACIAL & ORAL SURGERY                                                               | -      | NA <sup>S</sup>                   | 1 | 0   | 0   |
| JOURNAL OF MEDICAL INTERNET RESEARCH                                                                  | 5.034  | Q1 <sup>13,14</sup>               | 1 | 0   | 0   |
| JOURNAL OF ORAL MICROBIOLOGY                                                                          | 3.939  | Q2 <sup>15</sup>                  | 1 | 0   | 0   |
| JOURNAL OF ORAL RESEARCH                                                                              | -      | NA                                | 1 | 0   | 0   |
| JOURNAL OF ORTHODONTICS                                                                               | -      | NA <sup>S,#</sup>                 | 1 | 0   | 0   |
| JOURNAL OF OSSEOINTEGRATION                                                                           | -      | NA <sup>S</sup>                   | 1 | 0   | 0   |
| JOURNAL OF PROSTHETIC DENTISTRY                                                                       | 2.444  | Q1 <sup>1</sup>                   | 1 | 0   | 0   |
| JOURNAL OF STOMATOLOGY                                                                                | -      | NA                                | 1 | 0   | 0   |
| JOURNAL OF THE AMERICAN DENTAL ASSOCIATION                                                            | 2.803  | Q1 <sup>1</sup>                   | 1 | 0   | 0   |
| JOURNAL OF THE WORLD FEDERATION OF<br>ORTHODONTISTS                                                   | -      | NA <sup>S,#</sup>                 | 1 | 0   | 0   |
| JOURNAL OF ZHEJIANG UNIVERSITY-SCIENCE B                                                              | 2.082  | Q3 <sup>10,16,17</sup>            | 1 | 18  | 18  |
| LANCET INFECTIOUS DISEASES                                                                            | 24.446 | Q1 <sup>11</sup>                  | 1 | 246 | 246 |
| MEDICAL HYPOTHESES                                                                                    | 1.375  | Q4 <sup>10</sup>                  | 1 | 3   | 3   |
| MEDWAVE                                                                                               | -      | NA <sup>S,#</sup>                 | 1 | 0   | 0   |
| MINERVA STOMATOLOGICA                                                                                 | -      | NA <sup>S,#</sup>                 | 1 | 0   | 0   |
| MOLECULAR ORAL MICROBIOLOGY                                                                           | 2.905  | Q1 <sup>1</sup> /Q3 <sup>15</sup> | 1 | 4   | 4   |

|                                              |       |                  |   |    |    |
|----------------------------------------------|-------|------------------|---|----|----|
| NEDERLANDS TIJDSCHRIFT VOOR<br>TANDHEELKUNDE | -     | NA <sup>#</sup>  | 1 | 0  | 0  |
| OPEN DENTISTRY JOURNAL                       | -     | NA <sup>\$</sup> | 1 | 1  | 1  |
| ORAL AND MAXILLOFACIAL SURGERY CASES         | -     | NA               | 1 | 0  | 0  |
| ORTHODONTICS & CRANIOFACIAL RESEARCH         | 1.455 | Q3 <sup>1</sup>  | 1 | 0  | 0  |
| PEERJ                                        | 2.379 | Q2 <sup>18</sup> | 1 | 0  | 0  |
| SAUDI DENTAL JOURNAL                         | -     | NA <sup>\$</sup> | 1 | 15 | 15 |
| SOUTH AFRICAN DENTAL JOURNAL                 | -     | NA               | 1 | 0  | 0  |

---

QC - Journal Impact Factor 2019 Quartile in subject category; TA - the total number of articles; TC - the total number of citations for articles; mTC<sub>A</sub> - the average number of citations per article; NA - not applicable; WoS subject categories: <sup>1</sup> - DOSM; <sup>2</sup> - Surgery; <sup>3</sup> - Public, Environmental & Occupational Health; <sup>4</sup> - Environmental Sciences; <sup>5</sup> - Oncology; <sup>6</sup> - Otorhinolaryngology; <sup>7</sup> - Education, Scientific Disciplines; <sup>8</sup> - Materials Science, Biomaterials; <sup>9</sup> - Pediatrics; <sup>10</sup> - Medicine, Research & Experimental; <sup>11</sup> - Infectious Diseases; <sup>12</sup> - Medicine, General & Internal; <sup>13</sup> - Health Care Sciences & Services; <sup>14</sup> - Medical Informatics; <sup>15</sup> - Microbiology; <sup>16</sup> - Biochemistry & Molecular Biology; <sup>17</sup> - Biotechnology & Applied Microbiology; <sup>18</sup> - Multidisciplinary Sciences

\*The source of citations was Web of Science Core Collection.

#Journal indexed in MEDLINE.

\$Journal indexed in the Clarivate Analytics' Emerging Sources Citation Index.

\*\*Journal indexed in the Clarivate Analytics' Science Citation Index Expanded and Social Sciences Citation Index.
