# Supplementary material
Source: PubMed Central journal article supplement (PMC8022306)

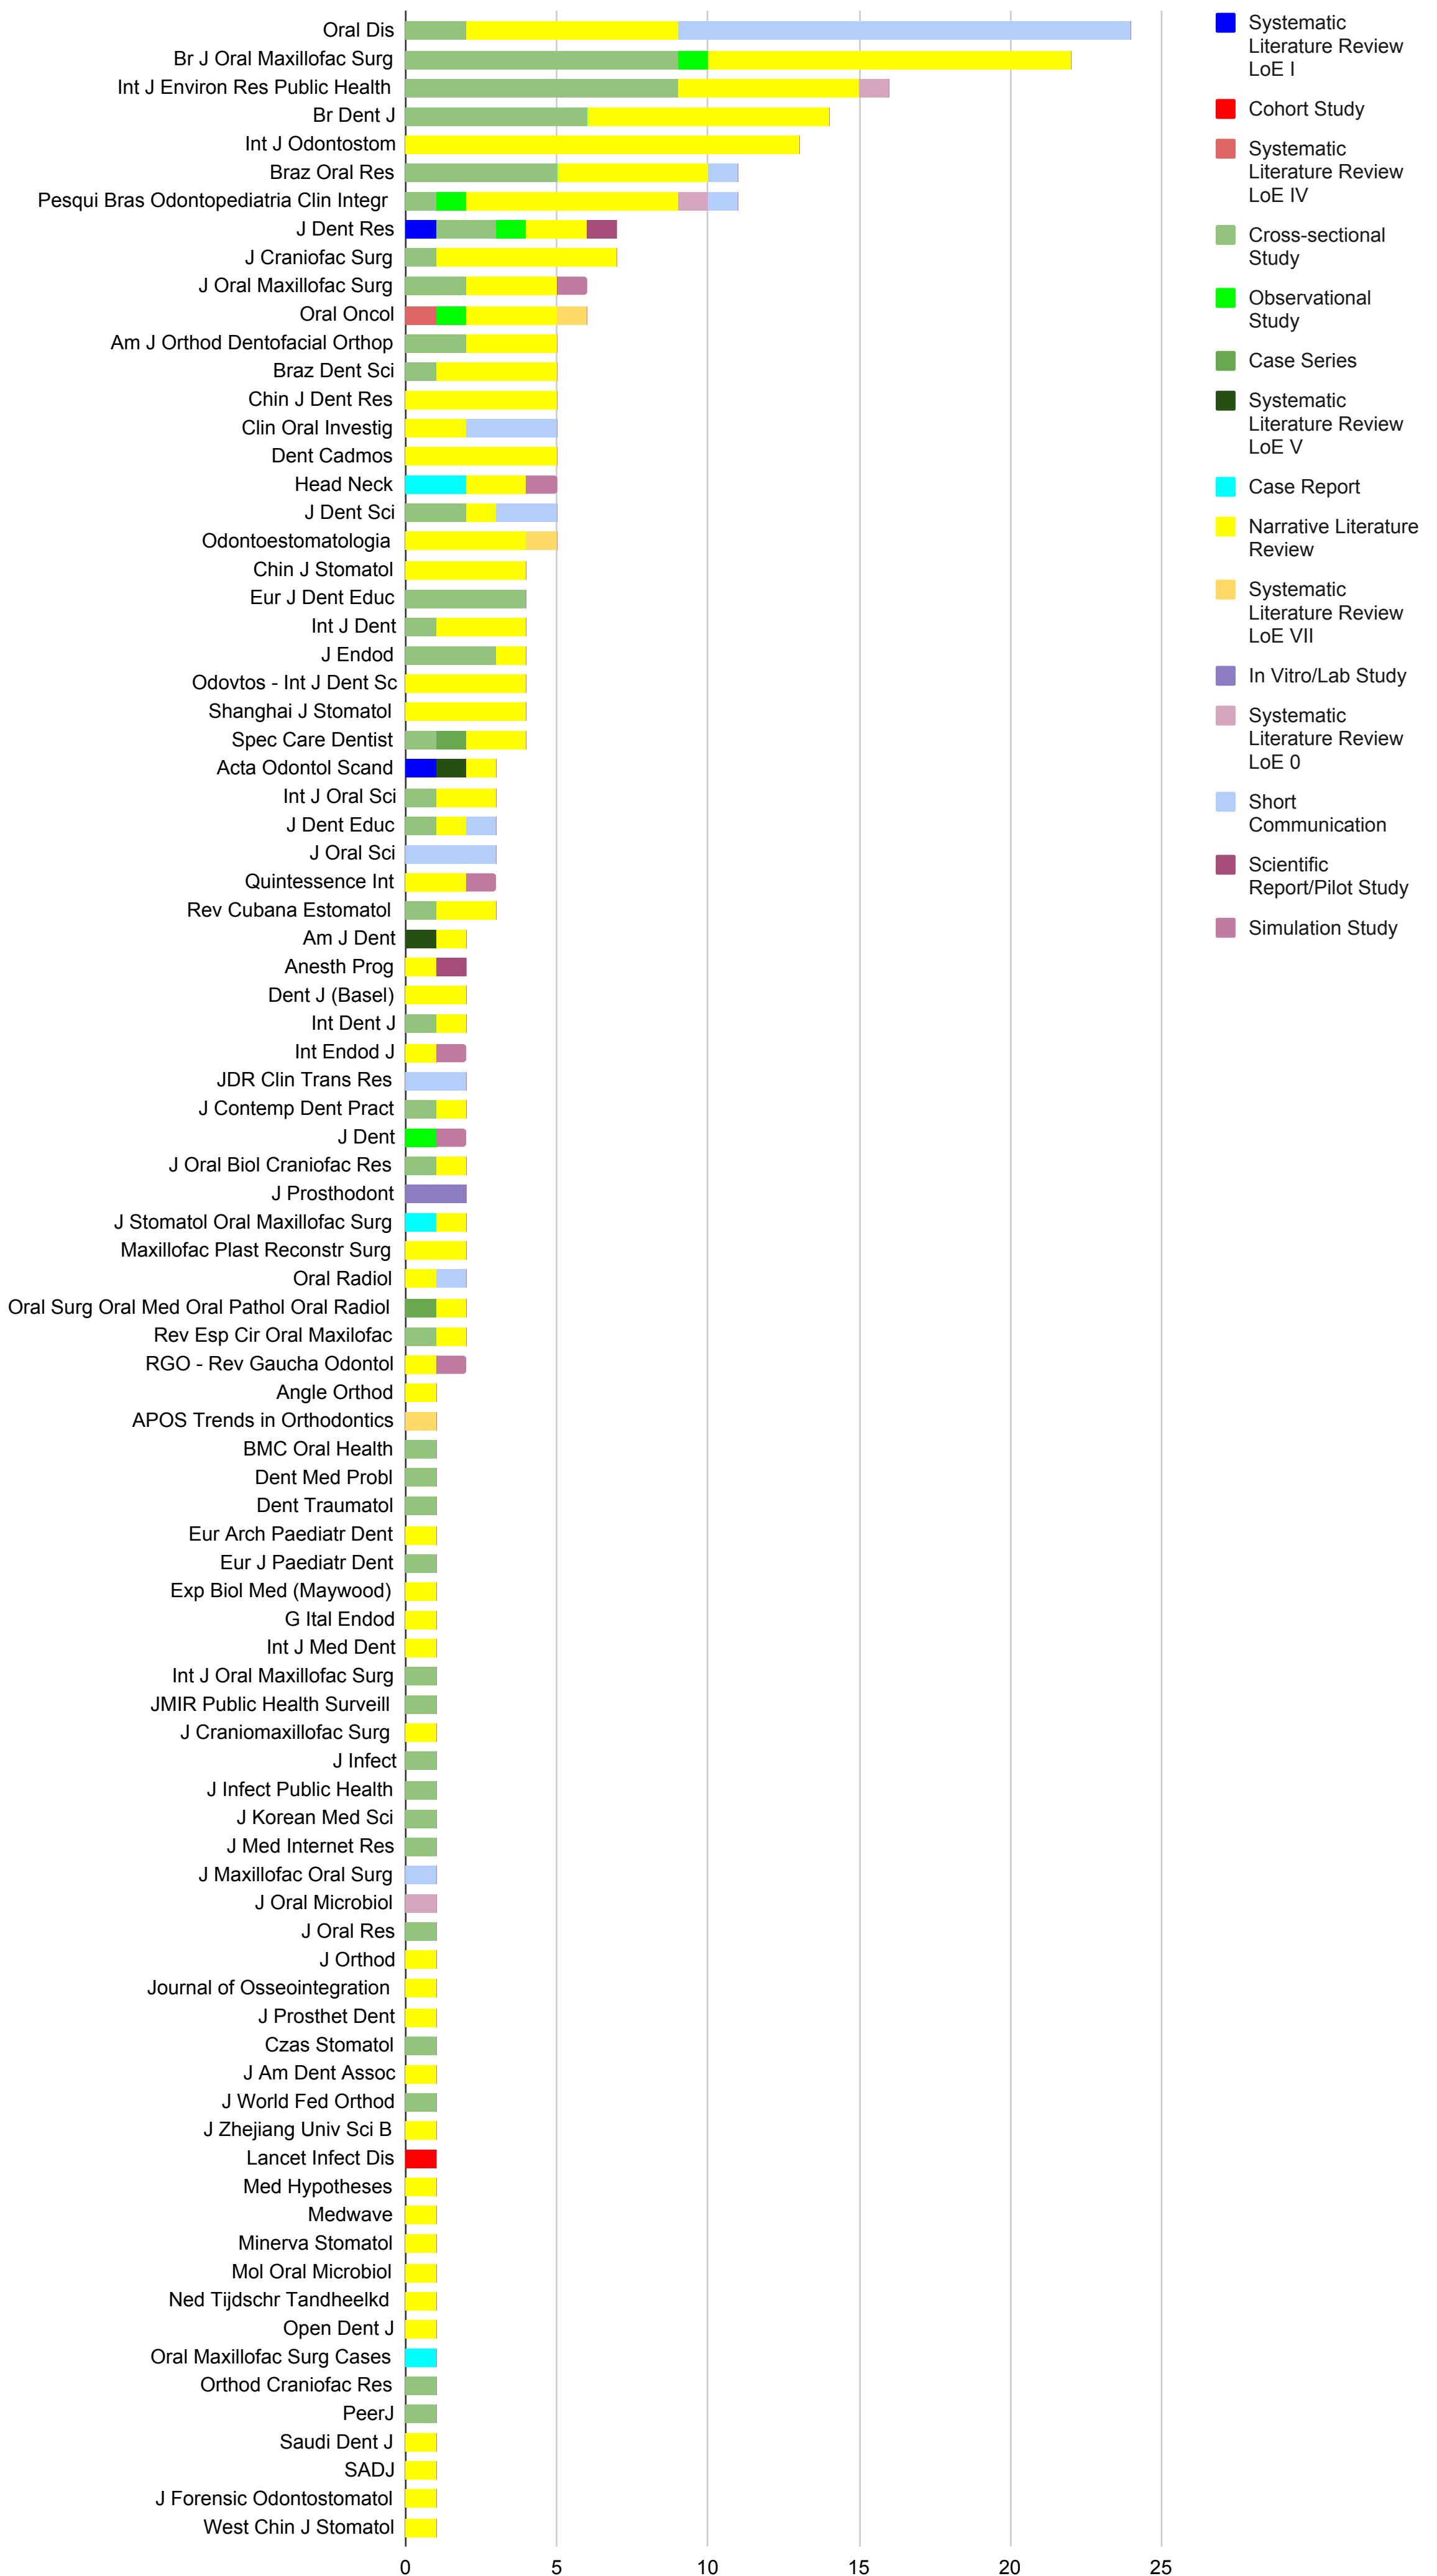

Supplement: 784_2021_3916_MOESM12_ESM.pdf [file 784_2021_3916_MOESM12_ESM.pdf]
